# Supplementary material for: Necessity of a Global Patient co-Owned Cloud (GPOC)
Source: Research Square preprint supplement (doi:10.21203/rs.3.rs-3004727/v1), 2023-07-18
Supplement: Supplementary file 1 [file a7990301706be9cd3bfa6426.xlsx]

## Sheet: GPOC_NEC Suppl Table_1
	Mixed							Country Based analysis					Organisation Based analysis
Equation	Obs	Parms	RMSE	"R-sq"	F	P		RMSE	"R-sq"	F	P		RMSE	"R-sq"	F	P
Q25	98	9	1.31938	0.1081	1.22375	0.3036		1.01938	0.1781	1.22375	0.0549		1.01538	0.1741	1.22375	0.055
Q4	58	9	0.52116	0.1215	0.776593	0.6341		0.22116	0.1915	0.776593	0.026		0.21716	0.1875	0.776593	0.0261
Q172	86	9	0.510173	0.0916	0.866436	0.5574		0.210173	0.1616	0.866436	0.0525		0.206173	0.1576	0.866436	0.0526
Q171	86	9	0.503333	0.1319	1.34909	0.2416		0.203333	0.2019	1.34909	0.0683		0.199333	0.1979	1.34909	0.0684				Ind1	Domestic general government health expenditure (% of current health expenditure) Share of current health expenditures funded from domestic public sources for health. Domestic public sources include domestic revenue as internal transfers and grants, transfers, subsidies to voluntary health insurance beneficiaries, non-profit institutions serving households (NPISH) or enterprise financing schemes a…
Q152	80	9	0.501512	0.0905	0.787221	0.6244		0.201512	0.1605	0.787221	0.0163		0.197512	0.1565	0.787221	0.0164				Ind2	Domestic general government health expenditure per capita, PPP (current international B$) Public expenditure on health from domestic sources per capita expressed in international dollars at purchasing power parity.
Q2	58	9	0.499197	0.1467	0.978383	0.473		0.199197	0.2167	0.978383	0.1369		0.195197	0.2127	0.978383	0.137				Ind3	Current health expenditure per capita, PPP (current international $)
Q201	86	9	0.497846	0.1527	1.61508	0.1433		0.197846	0.2227	1.61508	0.04747		0.193846	0.2187	1.61508	0.04757				Ind4	Current health expenditure per capita (current US$) Current expenditures on health per capita in current US dollars. Estimates of current health expenditures include healthcare goods and services consumed during each year.
Q151	80	9	0.490747	0.172	1.72881	0.1156		0.190747	0.242	1.72881	0.05024		0.186747	0.238	1.72881	0.05034				Ind5	Current health expenditure (% of GDP) Level of current health expenditure expressed as a percentage of GDP. Estimates of current health expenditures include healthcare goods and services consumed during each year. This indicator does not include capital health expenditures such as buildings, machinery, IT and stocks of vaccines for emergency or outbreaks.
Q161	80	9	0.485628	0.1897	1.95782	0.0735		0.185628	0.2597	1.95782	0.05445		0.181628	0.2557	1.95782	0.05455		5		Ind6	International migrant stock, total, International migrant stock is the number of people born in a country other than that in which they live. It also includes refugees. The data used to estimate the international migrant stock at a particular time are obtained mainly from population censuses. The estimates are derived from the data on foreign-born population--people who have residence in one coun…
Q162	80	9	0.484305	0.1123	1.02226	0.4366		0.184305	0.1823	1.02226	0.01814		0.180305	0.1783	1.02226	0.01824				Ind7	International migrant stock (% of population) International migrant stock is the number of people born in a country other than that in which they live. It also includes refugees. The data used to estimate the international migrant stock at a particular time are obtained mainly from population censuses. The estimates are derived from the data on foreign-born population--people who have residence i…
Q34	58	9	0.478531	0.1846	1.30464	0.2724		0.178531	0.2546	1.30464	0.03456		0.174531	0.2506	1.30464	0.03466				Ind8	Net migration, Net migration is the net total of migrants during the period, that is, the total number of immigrants less the annual number of emigrants, including both citizens and noncitizens. Data are five-year estimates.
Q191	86	9	0.476214	0.1016	0.982091	0.4655		0.176214	0.1716	0.982091	0.042335		0.172214	0.1676	0.982091	0.042435				Ind9	Population, total, Total population is based on the de facto definition of population, which counts all residents regardless of legal status or citizenship. The values shown are midyear estimates.
Q181	86	9	0.45035	0.1188	1.18718	0.3268		0.15035	0.1888	1.18718	0.02912		0.14635	0.1848	1.18718	0.02922				Ind10	GDP (current US$) GDP at purchaser's prices is the sum of gross value added by all resident producers in the economy plus any product taxes and minus any subsidies not included in the value of the products. It is calculated without making deductions for depreciation of fabricated assets or for depletion and degradation of natural resources. Data are in current U.S. dollars. Dollar figures for GDP…
Q122	80	9	0.442775	0.0869	0.749406	0.6569		0.142775	0.1569	0.749406	0.0488		0.138775	0.1529	0.749406	0.0489				Ind11	GDP (current BillionUS$) Adjusted share GDP at purchaser's prices is the sum of gross value added by all resident producers in the economy plus any product taxes and minus any subsidies not included in the value of the products. It is calculated without making deductions for depreciation of fabricated assets or for depletion and degradation of natural resources. Data are in current U.S. dollars. …
Q112	80	9	0.437648	0.0738	0.615364	0.7711		0.137648	0.1438	0.615364	0.163		0.133648	0.1398	0.615364	0.1631
Q142	80	9	0.432908	0.0944	0.828793	0.5892		0.132908	0.1644	0.828793	0.0207		0.128908	0.1604	0.828793	0.0208
Q202	86	9	0.43194	0.1116	1.10074	0.3811		0.13194	0.1816	1.10074	0.003179		0.12794	0.1776	1.10074	0.003279
Q28	98	9	0.431498	0.0462	0.429345	0.9096		0.131498	0.1162	0.429345	0.03096		0.127498	0.1122	0.429345	0.03106
Q30	98	9	0.425894	0.0715	0.742069	0.6632		0.125894	0.1415	0.742069	0.0551		0.121894	0.1375	0.742069	0.0552
Q132	80	9	0.424415	0.0518	0.396609	0.9279		0.124415	0.1218	0.396609	0.03279		0.120415	0.1178	0.396609	0.03289
Q26	98	9	0.421533	0.0575	0.567043	0.8112		0.121533	0.1275	0.567043	0.052922		0.117533	0.1235	0.567043	0.053022
Q7	58	9	0.410737	0.0534	0.284742	0.9769		0.110737	0.1234	0.284742	0.03769		0.106737	0.1194	0.284742	0.03779
Q5	58	9	0.409127	0.1847	1.30564	0.272		0.109127	0.2547	1.30564	0.0346		0.105127	0.2507	1.30564	0.0347
Q31	58	9	0.393671	0.1956	1.40498	0.2272		0.0936711	0.2656	1.40498	0.064718		0.0896711	0.2616	1.40498	0.064818
Q131	80	9	0.379333	0.1146	1.04827	0.418		0.0793325	0.1846	1.04827	0.02281		0.0753325	0.1806	1.04827	0.02291
Q24	98	9	0.371806	0.0328	0.270744	0.9828		0.0718059	0.1028	0.270744	0.074638		0.0678059	0.0988	0.270744	0.074738
Q141	80	9	0.370947	0.1547	1.51341	0.177		0.0709466	0.2247	1.51341	0.00522		0.0669466	0.2207	1.51341	0.00532
Q102	58	9	0.369223	0.0871	0.518544	0.8457		0.0692227	0.1571	0.518544	0.003267		0.0652227	0.1531	0.518544	0.003367
Q92	58	9	0.366081	0.1873	1.32895	0.2608		0.0660813	0.2573	1.32895	0.004382		0.0620813	0.2533	1.32895	0.004482
Q32	58	9	0.364809	0.2594	2.04625	0.069		0.0648094	0.3294	2.04625	0.0063		0.0608094	0.3254	2.04625	0.0064
Q33	58	9	0.364809	0.2594	2.04625	0.069		0.0648094	0.3294	2.04625	0.0549		0.0608094	0.3254	2.04625	0.055
Q192	86	9	0.358823	0.0267	0.1737	1.0028		0.0588231	0.0967	0.1737	0.004838		0.0548231	0.0927	0.1737	0.004938
Q121	80	9	0.355086	0.1127	1.02632	0.4336		0.0550863	0.1827	1.02632	0.01844		0.0510863	0.1787	1.02632	0.01854
Q182	86	9	0.351924	0.0651	0.571916	0.8068		0.0519244	0.1351	0.571916	0.02068		0.0479244	0.1311	0.571916	0.02078
Q22	98	9	0.349637	0.0931	1.02186	0.4347		0.0496365	0.1631	1.02186	0.01833		0.0456365	0.1591	1.02186	0.01843
Q6	58	9	0.306291	0.0611	0.336956	0.9563		0.0117089	0.1311	0.336956	0.004373		0.0077089	0.1271	0.336956	0.004473
Q034	102	9	0.286386	0.0384	0.352276	0.9515		0.0316138	0.1084	0.352276	0.03515		0.0276138	0.1044	0.352276	0.03525
Q23	98	9	0.275118	0.1511	1.8428	0.0884		0.0428815	0.2211	1.8428	0.05296		0.0388815	0.2171	1.8428	0.05306
Q35	102	9	0.266604	0.0624	0.655748	0.7378		0.0513956	0.1324	0.655748	0.01378		0.0473956	0.1284	0.655748	0.01388
Q031	102	9	0.26563	0.0695	0.749185	0.657		0.05237	0.1395	0.749185	0.0489		0.04837	0.1355	0.749185	0.049
Q033	102	9	0.265256	0.0723	0.785292	0.6257		0.0527436	0.1423	0.785292	0.0176		0.0487436	0.1383	0.785292	0.0177
Q36	102	9	0.24905	0.06	0.624775	0.7641		0.0689498	0.13	0.624775	0.156		0.0649498	0.126	0.624775	0.1561
Q27	98	9	0.247622	0.1093	1.24023	0.2944		0.0703781	0.1793	1.24023	0.094046		0.0663781	0.1753	1.24023	0.094146
Q111	80	9	0.24067	0.1961	2.04224	0.0624		0.0773303	0.2661	2.04224	0.006366		0.0733303	0.2621	2.04224	0.006466
Q101	58	9	0.239539	0.0936	0.565773	0.8096		0.0784608	0.1636	0.565773	0.02096		0.0744608	0.1596	0.565773	0.02106
Q21	98	9	0.231279	0.0823	0.879343	0.5461		0.0867206	0.1523	0.879343	0.0638		0.0827206	0.1483	0.879343	0.0639
Q37	102	9	0.208	0.0507	0.505837	0.8582		0.11	0.1207	0.505837	0.043392		0.106	0.1167	0.505837	0.043492
Q38	102	9	0.207612	0.0544	0.553313	0.8222		0.110389	0.1244	0.553313	0.093032		0.106389	0.1204	0.553313	0.093132
Q29	98	9	0.188185	0.0264	0.197096	0.9996		0.129815	0.0964	0.197096	0.03996		0.125815	0.0924	0.197096	0.04006
Q8	58	9	0.185118	0.2219	1.65701	0.1422		0.132882	0.2919	1.65701	0.04758		0.128882	0.2879	1.65701	0.04768
Q032	102	9	0.182706	0.0453	0.437436	0.9047		0.135294	0.1153	0.437436	0.029957		0.131294	0.1113	0.437436	0.030057
Q91	58	9	0.148384	0.0403	0.198137	0.9989		0.169616	0.1103	0.198137	0.054799		0.165616	0.1063	0.198137	0.054899
GPOC NEC Suppl Table 1:Iillustrates the statistical results with a p < 0.05.

## Sheet: GPOC NEC uppl Tab_2_Desc_Stats
Question	Variables	Yes			Neutral			No
		Response	Percent %	Cumulative	Response	Percent %	Cumulative	Response	Percent %	Cumulative
Q2	Q2. I have seen my personal health record.	183	68.54	100	n.a	n.a	n.a	84	31.46	31.46
Q3.1	Q3.1. I have experienced that having access to my own/my family's medical information has:resulted in better healthcare insights.	195	73.03	100	46	17.23	26.97	26	9.74	9.74
Q3.2	Q3.2. I have experienced that having access to my own/my family's medical information has:facilitated effective diagnosis	178	66.67	100	67	25.09	33.33	22	8.24	8.24
Q3.3	Q3.3. I have experienced that having access to my own/my family's medical information has:facilitated effective treatment	185	69.29	100	62	23.22	30.71	20	7.49	7.49
Q3.4	Q3.4. I have experienced that having access to my own/my family's medical information has:I have never experienced this.	60	22.47	100	86	32.21	77.53	121	45.32	45.32
Q4	Q4. I have been able to observe incorrect information in my own/family’s medical record	96	35.96	100	79	29.59	64.04	92	34.46	34.46
Q5	Q5. have sometimes felt that I would like to correct or comment or ask for clarifications in my medical record	171	64.04	100	62	23.22	35.96	34	12.73	12.73
Q6	Q6. I would like to know if someone has illegally accessed or tampered with my medical record without my consent, and who that person is	237	88.76	100	16	5.99	11.24	14	5.24	5.24
Q7	Q7. I think that tech giants should be able to use facts in my medical records as much as they intend	43	16.1	100	36	13.48	83.9	188	70.41	70.41
Q8	Q8. Companies should be able to use my medical records to earn money, without paying me or letting me know	9	3.37	100	16	5.99	96.63	242	90.64	90.64
Q9.1	Q9.1. I would be willing to allow medical research (clinical) using my medical record - if I consented.: With Consent	248	92.88	100	12	4.49	7.12	7	2.62	2.62
Q9.2	Q9.2. I would be willing to allow medical research (clinical) using my medical record - if I consented.: Without Consent	28	10.49	100	27	10.11	89.51	212	79.4	79.4
Q10.1	Q10.1. I would be willing to allow medical research (pharmaceutical) using my medical record - if I consented.: With Consent	235	88.01	100	18	6.74	11.99	14	5.24	5.24
Q10.2	Q10.2. I would be willing to allow medical research (pharmaceutical) using my medical record - if I consented.: Without Consent	28	10.49	100	25	9.36	89.51	214	80.15	80.15
Q11.1	Q11.1. I would be willing to allow medical research (public health) using my medical record - if I consented.: With Consent	243	91.01	100	14	5.24	8.99	10	3.75	3.75
Q11.2	Q11.2. I would be willing to allow medical research (public health) using my medical record - if I consented.: Without Consent	44	16.48	100	41	15.36	83.52	182	68.16	68.16
Q12.1	Q12.1. I would be willing to allow medical research (clinical) using my medical record - if my details were kept anonymously.: Anonymous	227	85.02	100	20	7.49	14.98	20	7.49	7.49
Q12.2	Q12.2. I would be willing to allow medical research (clinical) using my medical record - if my details were kept anonymously. Indifferent	34	12.73	100	56	20.97	87.27	177	66.29	66.29
Q13.1	Q13.1. I would be willing to allow medical research (pharmaceutical) using my medical record - if my details were kept anonymously.: Anonymous	215	80.52	100	18	6.74	19.48	34	12.73	12.73
Q13.2	Q13.2. I would be willing to allow medical research (pharmaceutical) using my medical record - if my details were kept anonymously.: Indifferent	26	9.74	100	54	20.22	90.26	187	70.04	70.04
Q14.1	Q14.1.I would be willing to allow medical research (public health) using my medical record - if my details were kept anonymously.: Anonymous	227	85.02	100	17	6.37	14.98	23	8.61	8.61
Q14.2	Q14.2. I would be willing to allow medical research (public health) using my medical record - if my details were kept anonymously.: Indifferent3	32	11.99	100	71	26.59	88.01	164	61.42	61.42
Q15.1	Q15.1. I would be willing to allow medical research (clinical) using my medical record - if I got paid for it.: Paid	117	43.82	100	80	29.96	56.18	70	26.22	26.22
Q15.2	Q15.2. I would be willing to allow medical research (clinical) using my medical record - if I got paid for it.: Unpaid	65	24.34	100	93	34.83	75.66	109	40.82	40.82
Q16.1	Q16.1. I would be willing to allow medical research (pharmaceutical) using my medical record - if I got paid for it.: Paid	126	47.19	100	69	25.84	52.81	72	26.97	26.97
Q16.2	Q16.2. I would be willing to allow medical research (pharmaceutical) using my medical record - if I got paid for it.: Unpaid2	55	20.6	100	89	33.33	79.4	123	46.07	46.07
Q17.1	Q17.1. I would be willing to allow medical research (public health) using my medical record - if I got paid for it.: Paid	118	44.19	100	80	29.96	55.81	69	25.84	25.84
Q17.2	Q17.2. I would be willing to allow medical research (public health) using my medical record - if I got paid for it.: Unpaid	76	28.46	100	108	40.45	71.54	83	31.09	31.09
Q18.1	Q18.1. I would be willing to allow non-medical research (e.g. consumer product design) using my medical record - if I consented.: With consent	178	66.67	100	33	12.36	33.33	56	20.97	20.97
Q18.2	Q18.2. I would be willing to allow non-medical research (e.g. consumer product design) using my medical record - if I consented.: Without consent	18	6.74	100	20	7.49	93.26	229	85.77	85.77
Q19.1	Q19.1. I would be willing to allow non-medical research (e.g. consumer product design) using my medical record - if my details were kept anonymously.: Anonymous	161	60.3	100	40	14.98	39.7	66	24.72	24.72
Q19.2	Q19.2. I would be willing to allow non-medical research (e.g. consumer product design) using my medical record - if my details were kept anonymously.: Indifferent	19	7.12	100	60	22.47	92.88	188	70.41	70.41
Q20.1	Q20.1. I would be willing to allow non-medical research (e.g. consumer product design) using my medical record - if I got paid for it.: Paid	122	45.69	100	56	20.97	54.31	89	33.33	33.33
Q20.2	Q20.2. I would be willing to allow non-medical research (e.g. consumer product design) using my medical record - if I got paid for it.: Unpaid3	32	11.99	100	68	25.47	88.01	167	62.55	62.55
Q21	Q21. I think it is my human right to co-own my medical record with my healthcare provider's at my home country	238	89.14	100	16	5.99	10.86	13	4.87	4.87
Q22	Q22. I think it is my human right to co-own my medical record with the government	207	77.53	100	25	9.36	22.47	35	13.11	13.11
Q23	Q23. I think it is my human right to co-own my medical record, to gain insights	228	85.39	100	21	7.87	14.61	18	6.74	6.74
Q24	Q24. I think it is my human right to co-own my medical record and share it globally with those I deem relevant	210	78.65	100	23	8.61	21.35	34	12.73	12.73
Q25	Q25. I would like to share my medical records with (Doctor at my home country(1), Doctor and healthcare providers abroad when travelling(2), My family member(3), My friend(4), Companies(5), A legally appointed representative, e.g. lasting power of attorney(6)
Q26	Q26. I think everyone should share their medical records for research for free, if kept anonymous, for humanity	172	64.42	100	54	20.22	35.58	41	15.36	15.36
Q27	Q27. I think that medical information should accompany/follow patients as a co-owned asset, wherever they move in the world – e.g. on travel, or if the individual becomes displaced as a refugee	224	83.9	100	29	10.86	16.1	14	5.24	5.24
Q28	Q28. I think states should own my medical records	43	16.1	100	54	20.22	83.9	170	63.67	63.67
Q29	Q29. I think states should own my medical records and sell it to whomever they like	10	3.75	100	8	3	96.25	249	93.26	93.26
Q30	Q30. I think states should own my medical records and sell it to whomever they like, ONLY if it generates additional revenue that can be invested into healthcare provision for citizens	45	16.85	100	38	14.23	83.15	184	68.91	68.91
Q31	Q31. I think a global, non-commercial, large and secure cloud, where I co-own my medical record would be an interesting concept	165	61.8	100	61	22.85	38.2	41	15.36	15.36
Q32	Q32. I think it ought to be possible to globally balance the legal rights and regulations about medical records and find a common ground, and that this would benefit health in general	211	79.03	100	38	14.23	20.97	18	6.74	6.74
Q33	Q33. I think I personally would benefit from global access and co-ownership and control of my medical records	189	70.79	100	49	18.35	29.21	29	10.86	10.86
Q34	Q34. A 3 unbiased, decentralised foundation, co-owned by you as a patient, designed to help regulate the flow of your medical information, is something that would be of interest to me	194	72.66	100	47	17.6	27.34	26	9.74	9.74
Q35	Q35. An infrastructure based on sound scientific and econometric models, with the involvement of patients, governments and institutions from all countries would be worthwhile	199	74.53	100	51	19.1	25.47	17	6.37	6.37
Q36	Q36. An infrastructure designed by global academics supported by research institutions with the involvement of patients, government and companies, could be founded	201	75.28	100	46	17.23	24.72	20	7.49	7.49
Q37	Q37. I think an electronic health record can be more environmentally sustainable	225	84.27	100	32	11.99	15.73	10	3.75	3.75
Q38	Q38. I think a global patient co-owned cloud can be more ecologically advantageous and environmentally sustainable	196	73.41	100	62	23.22	26.59	9	3.37	3.37
	Q25			Freq.	Percent	Cum.
		1	|	131	49.06	49.06
		2	|	78	29.21	78.28
		3	|	41	15.36	93.63
		4	|	2	0.75	94.38
		5	|	1	0.37	94.76
		6	|	14	5.24	100
		Total	|	267	100
GPOC NEC Suppl Table 2: Illusttrates the survery responces.

## Sheet: GPOC NEC Suppl Table 3 detail r
			Mixed
		|	Coef.	Std. Err.	t	P>|t|	[95% Conf. Interval]
Q031		|								Key
	Ind1	|	0.0033757	0.0018995	1.78	0.079	-0.0003964	0.0071477		Ind1	Domestic general government health expenditure (% of current health expenditure) Share of current health expenditures funded from domestic public sources for health. Domestic public sources include domestic revenue as internal transfers and grants, transfers, subsidies to voluntary health insurance beneficiaries, non-profit institutions serving households (NPISH) or enterprise financing schemes a…
	Ind2	|	-7.69e-05	0.0001039	-0.74	0.461	-0.0002833	0.0001295		Ind2	Domestic general government health expenditure per capita, PPP (current international B$) Public expenditure on health from domestic sources per capita expressed in international dollars at purchasing power parity.
	Ind3	|	1.4e-06	8.33e-05	0.02	0.987	-0.000164	0.0001668		Ind3	Current health expenditure per capita, PPP (current international $)																				Ind1	Domestic general government health expenditure (% of current health expenditure) Share of current health expenditures funded from domestic public sources for health. Domestic public sources include domestic revenue as internal transfers and grants, transfers, subsidies to voluntary health insurance beneficiaries, non-profit institutions serving households (NPISH) or enterprise financing schemes a…
	Ind4	|	3.82e-05	7.28e-05	0.52	0.601	-0.0001063	0.0001827		Ind4	Current health expenditure per capita (current US$) Current expenditures on health per capita in current US dollars. Estimates of current health expenditures include healthcare goods and services consumed during each year.																				Ind2	Domestic general government health expenditure per capita, PPP (current international B$) Public expenditure on health from domestic sources per capita expressed in international dollars at purchasing power parity.
	Ind5	|	0.007262	0.0109529	0.66	0.509	-0.0144882	0.0290122		Ind5	Current health expenditure (% of GDP) Level of current health expenditure expressed as a percentage of GDP. Estimates of current health expenditures include healthcare goods and services consumed during each year. This indicator does not include capital health expenditures such as buildings, machinery, IT and stocks of vaccines for emergency or outbreaks.																				Ind3	Current health expenditure per capita, PPP (current international $)
	Ind6	|	2.09e-10	2.81e-09	0.07	0.941	-5.37e-09	5.79e-09		Ind6	International migrant stock, total, International migrant stock is the number of people born in a country other than that in which they live. It also includes refugees. The data used to estimate the international migrant stock at a particular time are obtained mainly from population censuses. The estimates are derived from the data on foreign-born population--people who have residence in one coun…																				Ind4	Current health expenditure per capita (current US$) Current expenditures on health per capita in current US dollars. Estimates of current health expenditures include healthcare goods and services consumed during each year.
	Ind7	|	0.0007856	0.0029079	0.27	0.788	-0.004989	0.0065602		Ind7	International migrant stock (% of population) International migrant stock is the number of people born in a country other than that in which they live. It also includes refugees. The data used to estimate the international migrant stock at a particular time are obtained mainly from population censuses. The estimates are derived from the data on foreign-born population--people who have residence i…																				Ind5	Current health expenditure (% of GDP) Level of current health expenditure expressed as a percentage of GDP. Estimates of current health expenditures include healthcare goods and services consumed during each year. This indicator does not include capital health expenditures such as buildings, machinery, IT and stocks of vaccines for emergency or outbreaks.
	Ind8	|	8.96e-09	1.99e-08	0.45	0.653	-3.05e-08	4.85e-08		Ind8	Net migration, Net migration is the net total of migrants during the period, that is, the total number of immigrants less the annual number of emigrants, including both citizens and noncitizens. Data are five-year estimates.																				Ind6	International migrant stock, total, International migrant stock is the number of people born in a country other than that in which they live. It also includes refugees. The data used to estimate the international migrant stock at a particular time are obtained mainly from population censuses. The estimates are derived from the data on foreign-born population--people who have residence in one coun…
	_cons	|	0.724511	0.100841	7.18	0	0.524262	0.924761																							Ind7	International migrant stock (% of population) International migrant stock is the number of people born in a country other than that in which they live. It also includes refugees. The data used to estimate the international migrant stock at a particular time are obtained mainly from population censuses. The estimates are derived from the data on foreign-born population--people who have residence i…
Q032		|																													Ind8	Net migration, Net migration is the net total of migrants during the period, that is, the total number of immigrants less the annual number of emigrants, including both citizens and noncitizens. Data are five-year estimates.
	Ind1	|	0.0005664	0.0012857	0.44	0.661	-0.0019868	0.0031196																							Ind9	Population, total, Total population is based on the de facto definition of population, which counts all residents regardless of legal status or citizenship. The values shown are midyear estimates.
	Ind2	|	1.09e-05	7.03e-05	0.15	0.878	-0.0001288	0.0001505																							Ind10	GDP (current US$) GDP at purchaser's prices is the sum of gross value added by all resident producers in the economy plus any product taxes and minus any subsidies not included in the value of the products. It is calculated without making deductions for depreciation of fabricated assets or for depletion and degradation of natural resources. Data are in current U.S. dollars. Dollar figures for GDP…
	Ind3	|	1.76e-05	5.64e-05	0.31	0.756	-9.44e-05	0.0001295																							Ind11	GDP (current BillionUS$) Adjusted share GDP at purchaser's prices is the sum of gross value added by all resident producers in the economy plus any product taxes and minus any subsidies not included in the value of the products. It is calculated without making deductions for depreciation of fabricated assets or for depletion and degradation of natural resources. Data are in current U.S. dollars. …
	Ind4	|	-2.07e-05	4.93e-05	-0.42	0.675	-0.0001185	7.71e-05																								omitted because collinearity
	Ind5	|	0.0065091	0.0074137	0.88	0.382	-0.0082131	0.0212313
	Ind6	|	-2.1e-11	1.9e-09	-0.01	0.991	-3.8e-09	3.76e-09
	Ind7	|	0.0013703	0.0019683	0.7	0.488	-0.0025383	0.005279
	Ind8	|	7.38e-09	1.35e-08	0.55	0.585	-1.94e-08	3.41e-08
	_cons	|	0.882687	0.0682564	12.93	0	0.747143	1.01823
Q033		|
	Ind1	|	0.0006552	0.0018967	0.35	0.731	-0.0031113	0.0044218
	Ind2	|	1.67e-05	0.0001038	0.16	0.872	-0.0001893	0.0002228
	Ind3	|	-1.4e-05	8.32e-05	-0.17	0.867	-0.0001792	0.0001512
	Ind4	|	-3.31e-06	7.27e-05	-0.05	0.964	-0.0001476	0.000141
	Ind5	|	0.021074	0.0109369	1.93	0.057	-0.0006445	0.0427926
	Ind6	|	-1.47e-11	2.81e-09	-0.01	0.996	-5.59e-09	5.56e-09
	Ind7	|	0.0003989	0.0029037	0.14	0.891	-0.0053673	0.006165
	Ind8	|	-1.31e-08	1.99e-08	-0.66	0.511	-5.26e-08	2.63e-08
	_cons	|	0.764888	0.100694	7.6	0	0.564931	0.964846
Q034		|
	Ind1	|	0.0014469	0.0020531	0.7	0.483	-0.0026302	0.005524
	Ind2	|	-2.77e-05	0.0001123	-0.25	0.806	-0.0002508	0.0001953
	Ind3	|	-5.38e-05	9e-05	-0.6	0.552	-0.0002326	0.000125
	Ind4	|	6.49e-05	7.87e-05	0.83	0.411	-9.13e-05	0.0002211
	Ind5	|	0.0060389	0.0118387	0.51	0.611	-0.0174704	0.0295483
	Ind6	|	1.45e-09	3.04e-09	0.48	0.635	-4.58e-09	7.48e-09
	Ind7	|	0.0019957	0.0031431	0.63	0.527	-0.0042459	0.0082374
	Ind8	|	1.19e-10	2.15e-08	0.01	0.996	-4.26e-08	4.28e-08
	_cons	|	0.812631	0.108996	7.46	0	0.596186	1.02908
Q35		|
	Ind1	|	-0.0002725	0.0019067	-0.14	0.887	-0.0040588	0.0035139
	Ind2	|	7.67e-05	0.0001043	0.74	0.464	-0.0001304	0.0002839
	Ind3	|	4.92e-05	8.36e-05	0.59	0.558	-0.0001168	0.0002152
	Ind4	|	-7.51e-05	7.3e-05	-1.03	0.306	-0.0002202	6.99e-05
	Ind5	|	0.0119522	0.0109944	1.09	0.28	-0.0098806	0.033785
	Ind6	|	7.77e-10	2.82e-09	0.28	0.783	-4.82e-09	6.38e-09
	Ind7	|	-0.0006462	0.002919	-0.22	0.825	-0.0064427	0.0051503
	Ind8	|	-1.74e-09	2e-08	-0.09	0.931	-4.14e-08	3.79e-08
	_cons	|	0.825702	0.101223	8.16	0	0.624692	1.02671
Q36		|
	Ind1	|	0.00122	0.0017768	0.69	0.494	-0.0023083	0.0047484
	Ind2	|	-5.89e-05	9.72e-05	-0.61	0.546	-0.0002519	0.0001341
	Ind3	|	0.0001109	7.79e-05	1.42	0.158	-4.39e-05	0.0002656
	Ind4	|	-7.86e-05	6.81e-05	-1.16	0.251	-0.0002138	5.65e-05
	Ind5	|	0.0112755	0.0102452	1.1	0.274	-0.0090696	0.0316205
	Ind6	|	7.48e-10	2.63e-09	0.28	0.776	-4.47e-09	5.97e-09
	Ind7	|	0.0015002	0.0027201	0.55	0.583	-0.0039013	0.0069017
	Ind8	|	-3.7e-09	1.86e-08	-0.2	0.843	-4.06e-08	3.32e-08
	_cons	|	0.779352	0.0943257	8.26	0	0.59204	0.966665
Q37		|
	Ind1	|	0.0008908	0.0014729	0.6	0.547	-0.0020342	0.0038158
	Ind2	|	4.48e-06	8.06e-05	0.06	0.956	-0.0001556	0.0001645
	Ind3	|	3.86e-05	6.46e-05	0.6	0.551	-8.96e-05	0.0001669
	Ind4	|	-3.44e-05	5.64e-05	-0.61	0.544	-0.0001465	7.77e-05
	Ind5	|	0.0065843	0.0084932	0.78	0.44	-0.0102815	0.0234502
	Ind6	|	2.12e-10	2.18e-09	0.1	0.923	-4.11e-09	4.54e-09
	Ind7	|	0.0015039	0.0022549	0.67	0.506	-0.0029739	0.0059817
	Ind8	|	3.31e-09	1.54e-08	0.21	0.831	-2.73e-08	3.39e-08
	_cons	|	0.846262	0.0781952	10.82	0	0.690982	1.00154
Q38		|
	Ind1	|	0.0006731	0.0014701	0.46	0.648	-0.0022462	0.0035924
	Ind2	|	-1.22e-05	8.04e-05	-0.15	0.88	-0.0001719	0.0001475
	Ind3	|	-4.49e-05	6.45e-05	-0.7	0.488	-0.0001729	8.31e-05
	Ind4	|	4.03e-05	5.63e-05	0.72	0.476	-7.15e-05	0.0001522
	Ind5	|	0.0124763	0.0084767	1.47	0.144	-0.0043567	0.0293092
	Ind6	|	8.27e-11	2.17e-09	0.04	0.97	-4.23e-09	4.4e-09
	Ind7	|	0.0020331	0.0022505	0.9	0.369	-0.002436	0.0065022
	Ind8	|	5.57e-09	1.54e-08	0.36	0.718	-2.5e-08	3.61e-08
	_cons	|	0.856796	0.0780427	10.98	0	0.701818	1.01177
GPOC		|
	Ind1	|	0.0069918	0.009304	0.75	0.454	-0.0114841	0.0254677
	Ind2	|	-5.92e-05	0.000509	-0.12	0.908	-0.0010701	0.0009516
	Ind3	|	0.0001113	0.000408	0.27	0.786	-0.0006989	0.0009214
	Ind4	|	-7.47e-05	0.0003565	-0.21	0.834	-0.0007825	0.0006331
	Ind5	|	0.0641118	0.0536485	1.2	0.235	-0.0424235	0.170647
	Ind6	|	3.15e-09	1.38e-08	0.23	0.82	-2.42e-08	3.05e-08
	Ind7	|	0.0054045	0.0142434	0.38	0.705	-0.0228801	0.033689
	Ind8	|	-2.09e-09	9.74e-08	-0.02	0.983	-1.96e-07	1.91e-07
	_cons	|	4.78977	0.493929	9.7	0	3.80893	5.77062
Q21		|
	Ind1	|	-0.0013301	0.0017735	-0.75	0.455	-0.0048541	0.0021939
	Ind2	|	3.45e-05	9.22e-05	0.37	0.709	-0.0001486	0.0002177
	Ind3	|	-0.0001094	7.72e-05	-1.42	0.16	-0.0002629	4.4e-05
	Ind4	|	9.25e-05	6.17e-05	1.5	0.137	-3.01e-05	0.0002152
	Ind5	|	-0.0011842	0.0110341	-0.11	0.915	-0.0231086	0.0207402
	Ind6	|	6.44e-10	2.13e-09	0.3	0.763	-3.58e-09	4.87e-09
	Ind7	|	-0.001407	0.002849	-0.49	0.623	-0.0070678	0.0042539
	Ind8	|	2.39e-08	1.54e-08	1.55	0.125	-6.77e-09	5.45e-08
	_cons	|	1.05104	0.0948138	11.09	0	0.862644	1.23943
Q22		|
	Ind1	|	0.000698	0.0027179	0.26	0.798	-0.0047024	0.0060984
	Ind2	|	2.3e-05	0.0001413	0.16	0.871	-0.0002577	0.0003037
	Ind3	|	-0.0002157	0.0001183	-1.82	0.072	-0.0004509	1.94e-05
	Ind4	|	0.0001814	9.46e-05	1.92	0.058	-6.51e-06	0.0003694
	Ind5	|	0.0118605	0.0169093	0.7	0.485	-0.021738	0.045459
	Ind6	|	3.08e-09	3.26e-09	0.94	0.348	-3.4e-09	9.55e-09
	Ind7	|	-0.0074083	0.004366	-1.7	0.093	-0.0160833	0.0012668
	Ind8	|	1.8e-08	2.36e-08	0.76	0.449	-2.89e-08	6.49e-08
	_cons	|	0.865277	0.145299	5.96	0	0.57657	1.15398
Q23		|
	Ind1	|	-0.0019446	0.0021233	-0.92	0.362	-0.0061636	0.0022744
	Ind2	|	0.0002559	0.0001104	2.32	0.023	3.66e-05	0.0004752
	Ind3	|	-0.0002349	9.24e-05	-2.54	0.013	-0.0004186	-5.12e-05
	Ind4	|	5.84e-05	7.39e-05	0.79	0.431	-8.84e-05	0.0002053
	Ind5	|	0.0073614	0.0132102	0.56	0.579	-0.018887	0.0336099
	Ind6	|	9.52e-10	2.55e-09	0.37	0.709	-4.11e-09	6.01e-09
	Ind7	|	-0.0092428	0.0034109	-2.71	0.008	-0.0160201	-0.0024655
	Ind8	|	3.06e-08	1.84e-08	1.66	0.101	-6.09e-09	6.72e-08
	_cons	|	1.07305	0.113513	9.45	0	0.8475	1.2986
Q24		|
	Ind1	|	-0.0005416	0.0028948	-0.19	0.852	-0.0062935	0.0052103
	Ind2	|	1.78e-05	0.0001505	0.12	0.906	-0.0002812	0.0003167
	Ind3	|	-6.98e-05	0.000126	-0.55	0.581	-0.0003203	0.0001806
	Ind4	|	5.58e-05	0.0001007	0.55	0.581	-0.0001443	0.000256
	Ind5	|	0.00664	0.0180098	0.37	0.713	-0.0291452	0.0424252
	Ind6	|	1.06e-09	3.47e-09	0.31	0.761	-5.83e-09	7.96e-09
	Ind7	|	-0.0056437	0.0046501	-1.21	0.228	-0.0148834	0.0035959
	Ind8	|	-4e-09	2.52e-08	-0.16	0.874	-5.4e-08	4.6e-08
	_cons	|	0.892015	0.154756	5.76	0	0.584519	1.19951
Q25		|
	Ind1	|	-0.0025822	0.0104554	-0.25	0.805	-0.0233569	0.0181925
	Ind2	|	0.0002654	0.0005435	0.49	0.627	-0.0008145	0.0013452
	Ind3	|	-0.0003652	0.0004552	-0.8	0.425	-0.0012698	0.0005393
	Ind4	|	0.0004241	0.0003639	1.17	0.247	-0.0002989	0.0011471
	Ind5	|	-0.0592938	0.065048	-0.91	0.364	-0.188543	0.0699552
	Ind6	|	-5.7e-09	1.25e-08	-0.45	0.65	-3.06e-08	1.92e-08
	Ind7	|	-0.0105733	0.0167953	-0.63	0.531	-0.0439452	0.0227985
	Ind8	|	1.85e-07	9.08e-08	2.04	0.044	4.77e-09	3.66e-07
	_cons	|	2.40393	0.558947	4.3	0	1.29331	3.51454
Q26		|
	Ind1	|	-0.0017201	0.0032916	-0.52	0.603	-0.0082604	0.0048201
	Ind2	|	0.0001876	0.0001711	1.1	0.276	-0.0001524	0.0005275
	Ind3	|	5.73e-05	0.0001433	0.4	0.69	-0.0002275	0.0003421
	Ind4	|	-0.0001495	0.0001146	-1.31	0.195	-0.0003772	7.81e-05
	Ind5	|	0.0153692	0.0204783	0.75	0.455	-0.0253208	0.0560592
	Ind6	|	-8.81e-10	3.95e-09	-0.22	0.824	-8.72e-09	6.96e-09
	Ind7	|	4.74e-05	0.0052875	0.01	0.993	-0.0104586	0.0105535
	Ind8	|	3.5e-08	2.86e-08	1.23	0.224	-2.18e-08	9.19e-08
	_cons	|	0.734004	0.175967	4.17	0	0.384362	1.08365
Q27		|
	Ind1	|	0.0024061	0.0019039	1.26	0.21	-0.0013769	0.0061892
	Ind2	|	-5.92e-05	9.9e-05	-0.6	0.551	-0.0002559	0.0001374
	Ind3	|	-5.87e-05	8.29e-05	-0.71	0.481	-0.0002234	0.000106
	Ind4	|	8.76e-05	6.63e-05	1.32	0.189	-4.4e-05	0.0002193
	Ind5	|	0.0047124	0.0118453	0.4	0.692	-0.018824	0.0282487
	Ind6	|	-1.66e-10	2.28e-09	-0.07	0.942	-4.7e-09	4.37e-09
	Ind7	|	-0.0030854	0.0030584	-1.01	0.316	-0.0091624	0.0029917
	Ind8	|	4.02e-08	1.65e-08	2.43	0.017	7.35e-09	7.31e-08
	_cons	|	0.846415	0.101785	8.32	0	0.644171	1.04866
Q28		|
	Ind1	|	0.0001465	0.0033711	0.04	0.965	-0.0065518	0.0068447
	Ind2	|	1.19e-05	0.0001752	0.07	0.946	-0.0003363	0.0003601
	Ind3	|	-9.02e-05	0.0001468	-0.61	0.54	-0.0003819	0.0002014
	Ind4	|	3.3e-05	0.0001173	0.28	0.779	-0.0002002	0.0002661
	Ind5	|	0.0011675	0.020973	0.06	0.956	-0.0405054	0.0428404
	Ind6	|	1.82e-09	4.04e-09	0.45	0.654	-6.21e-09	9.85e-09
	Ind7	|	-0.0040945	0.0054152	-0.76	0.452	-0.0148543	0.0066653
	Ind8	|	-1.56e-08	2.93e-08	-0.53	0.595	-7.38e-08	4.26e-08
	_cons	|	0.284635	0.180217	1.58	0.118	-0.0734533	0.642722
Q29		|
	Ind1	|	0.0010622	0.0014297	0.74	0.459	-0.0017786	0.003903
	Ind2	|	-6.35e-06	7.43e-05	-0.09	0.932	-0.000154	0.0001413
	Ind3	|	2.2e-05	6.22e-05	0.35	0.724	-0.0001017	0.0001457
	Ind4	|	-2.51e-05	4.98e-05	-0.5	0.616	-0.0001239	7.38e-05
	Ind5	|	0.0006869	0.0088948	0.08	0.939	-0.0169869	0.0183607
	Ind6	|	-7.6e-10	1.71e-09	-0.44	0.659	-4.17e-09	2.65e-09
	Ind7	|	0.0002034	0.0022966	0.09	0.93	-0.0043599	0.0047668
	Ind8	|	8.88e-10	1.24e-08	0.07	0.943	-2.38e-08	2.56e-08
	_cons	|	-0.0222404	0.0764316	-0.29	0.772	-0.174108	0.129628
Q30		|
	Ind1	|	0.0019213	0.0033264	0.58	0.565	-0.0046881	0.0085307
	Ind2	|	-3.47e-05	0.0001729	-0.2	0.841	-0.0003783	0.0003088
	Ind3	|	-6e-05	0.0001448	-0.41	0.68	-0.0003478	0.0002278
	Ind4	|	1.92e-06	0.0001158	0.02	0.987	-0.0002281	0.0002319
	Ind5	|	0.0292413	0.0206948	1.41	0.161	-0.0118788	0.0703614
	Ind6	|	-1.92e-10	3.99e-09	-0.05	0.962	-8.12e-09	7.73e-09
	Ind7	|	-0.0032179	0.0053434	-0.6	0.549	-0.0138351	0.0073992
	Ind8	|	2.54e-08	2.89e-08	0.88	0.382	-3.2e-08	8.28e-08
	_cons	|	0.0580457	0.177827	0.33	0.745	-0.295293	0.411384
Q171		|
	Ind1	|	0.0063618	0.0043374	1.47	0.147	-0.0022751	0.0149987
	Ind2	|	-4.1e-05	0.0002309	-0.18	0.859	-0.0005007	0.0004187
	Ind3	|	-0.0004063	0.000228	-1.78	0.079	-0.0008604	4.77e-05
	Ind4	|	0.0003347	0.0001617	2.07	0.042	1.27e-05	0.0006567
	Ind5	|	0.0434588	0.0299838	1.45	0.151	-0.0162466	0.103164
	Ind6	|	1.44e-09	2.01e-09	0.71	0.478	-2.57e-09	5.45e-09
	Ind7	|	-0.0071336	0.0047682	-1.5	0.139	-0.0166283	0.0023611
	Ind8	|	-1.02e-08	4.51e-08	-0.23	0.821	-1e-07	7.96e-08
	_cons	|	0.168692	0.227523	0.74	0.461	-0.284365	0.621748
Q172		|
	Ind1	|	0.0045641	0.0043974	1.04	0.303	-0.0041922	0.0133205
	Ind2	|	-7.35e-05	0.0002341	-0.31	0.754	-0.0005395	0.0003926
	Ind3	|	-0.0003506	0.0002312	-1.52	0.134	-0.0008109	0.0001098
	Ind4	|	0.0003135	0.0001639	1.91	0.06	-1.3e-05	0.00064
	Ind5	|	0.0441191	0.0303986	1.45	0.151	-0.0164123	0.10465
	Ind6	|	1.32e-09	2.04e-09	0.64	0.521	-2.75e-09	5.38e-09
	Ind7	|	0.0019624	0.0048342	0.41	0.686	-0.0076637	0.0115885
	Ind8	|	-1.67e-08	4.58e-08	-0.37	0.716	-1.08e-07	7.44e-08
	_cons	|	0.0755571	0.230671	0.33	0.744	-0.383767	0.534882
Q181		|
	Ind1	|	0.0048067	0.0038725	1.24	0.218	-0.0029045	0.0125178
	Ind2	|	-4.47e-05	0.0002061	-0.22	0.829	-0.0004552	0.0003657
	Ind3	|	-0.0004592	0.0002036	-2.26	0.027	-0.0008646	-5.38e-05
	Ind4	|	0.0003774	0.0001444	2.61	0.011	8.99e-05	0.0006649
	Ind5	|	5.15e-05	0.0267701	0	0.998	-0.0532546	0.0533576
	Ind6	|	-3.79e-10	1.8e-09	-0.21	0.834	-3.96e-09	3.2e-09
	Ind7	|	0.0005444	0.0042571	0.13	0.899	-0.0079327	0.0090215
	Ind8	|	-1.49e-09	4.03e-08	-0.04	0.971	-8.17e-08	7.88e-08
	_cons	|	0.700473	0.203137	3.45	0.001	0.295976	1.10497
Q182		|
	Ind1	|	-0.0028662	0.0030089	-0.95	0.344	-0.0088577	0.0031253
	Ind2	|	0.0002214	0.0001602	1.38	0.171	-9.75e-05	0.0005403
	Ind3	|	-5.11e-05	0.0001582	-0.32	0.748	-0.0003661	0.0002639
	Ind4	|	-2.05e-05	0.0001122	-0.18	0.855	-0.0002439	0.0002029
	Ind5	|	-0.0293973	0.0208001	-1.41	0.162	-0.0708155	0.012021
	Ind6	|	2.04e-10	1.4e-09	0.15	0.884	-2.58e-09	2.99e-09
	Ind7	|	-0.0018059	0.0033078	-0.55	0.587	-0.0083925	0.0047807
	Ind8	|	-3.26e-09	3.13e-08	-0.1	0.917	-6.56e-08	5.91e-08
	_cons	|	0.389014	0.157835	2.46	0.016	0.0747241	0.703305
Q191		|
	Ind1	|	0.0056979	0.0040995	1.39	0.169	-0.0024652	0.0138609
	Ind2	|	-2.18e-05	0.0002182	-0.1	0.921	-0.0004562	0.0004127
	Ind3	|	-0.0004683	0.0002155	-2.17	0.033	-0.0008975	-3.92e-05
	Ind4	|	0.0003655	0.0001528	2.39	0.019	6.12e-05	0.0006698
	Ind5	|	0.0163177	0.0283388	0.58	0.566	-0.0401122	0.0727475
	Ind6	|	-7.44e-10	1.9e-09	-0.39	0.697	-4.53e-09	3.05e-09
	Ind7	|	0.0025679	0.0045066	0.57	0.57	-0.0064059	0.0115418
	Ind8	|	-1.45e-08	4.27e-08	-0.34	0.734	-9.95e-08	7.04e-08
	_cons	|	0.501297	0.215041	2.33	0.022	0.0730961	0.929499
Q192		|
	Ind1	|	0.0006527	0.0030694	0.21	0.832	-0.0054593	0.0067647
	Ind2	|	2e-05	0.0001634	0.12	0.903	-0.0003053	0.0003453
	Ind3	|	1.46e-05	0.0001614	0.09	0.928	-0.0003068	0.0003359
	Ind4	|	-4.14e-05	0.0001144	-0.36	0.718	-0.0002693	0.0001865
	Ind5	|	-0.0003208	0.0212185	-0.02	0.988	-0.0425722	0.0419307
	Ind6	|	-7.55e-11	1.43e-09	-0.05	0.958	-2.91e-09	2.76e-09
	Ind7	|	-0.0008868	0.0033743	-0.26	0.793	-0.0076059	0.0058323
	Ind8	|	-2.06e-08	3.19e-08	-0.65	0.52	-8.42e-08	4.3e-08
	_cons	|	0.107756	0.161011	0.67	0.505	-0.212857	0.428369
Q201		|
	Ind1	|	0.0092951	0.0042893	2.17	0.033	0.0007541	0.0178361
	Ind2	|	-7.65e-05	0.0002283	-0.34	0.738	-0.0005311	0.0003781
	Ind3	|	-0.0004501	0.0002255	-2	0.049	-0.0008992	-1.11e-06
	Ind4	|	0.000426	0.0001599	2.66	0.009	0.0001076	0.0007444
	Ind5	|	0.0055611	0.0296509	0.19	0.852	-0.0534815	0.0646037
	Ind6	|	1.13e-09	1.99e-09	0.57	0.571	-2.83e-09	5.1e-09
	Ind7	|	-0.0002771	0.0047153	-0.06	0.953	-0.0096664	0.0091123
	Ind8	|	3.43e-08	4.46e-08	0.77	0.445	-5.46e-08	1.23e-07
	_cons	|	0.165531	0.224997	0.74	0.464	-0.282496	0.613558
Q202		|
	Ind1	|	-0.0067661	0.003711	-1.82	0.072	-0.0141556	0.0006235
	Ind2	|	0.0001033	0.0001975	0.52	0.602	-0.00029	0.0004966
	Ind3	|	9.35e-05	0.0001951	0.48	0.633	-0.000295	0.000482
	Ind4	|	-0.0001371	0.0001384	-0.99	0.325	-0.0004126	0.0001384
	Ind5	|	-0.0179932	0.0256534	-0.7	0.485	-0.0690757	0.0330894
	Ind6	|	-8.65e-10	1.72e-09	-0.5	0.617	-4.3e-09	2.57e-09
	Ind7	|	-0.0026459	0.0040796	-0.65	0.519	-0.0107694	0.0054775
	Ind8	|	4.69e-09	3.86e-08	0.12	0.904	-7.22e-08	8.16e-08
	_cons	|	0.653389	0.194664	3.36	0.001	0.265764	1.04101
Q111		|
	Ind1	|	0.001226	0.0022458	0.55	0.587	-0.0032521	0.005704
	Ind2	|	0.000326	0.0001578	2.07	0.043	1.13e-05	0.0006407
	Ind3	|	-0.000205	0.0001055	-1.94	0.056	-0.0004153	5.29e-06
	Ind4	|	-5.24e-05	0.0001014	-0.52	0.607	-0.0002545	0.0001498
	Ind5	|	-0.0028515	0.0155707	-0.18	0.855	-0.0338985	0.0281955
	Ind6	|	-4.03e-11	9.36e-10	-0.04	0.966	-1.91e-09	1.83e-09
	Ind7	|	0.0012245	0.0023555	0.52	0.605	-0.0034722	0.0059212
	Ind8	|	1.42e-08	1.62e-08	0.87	0.385	-1.82e-08	4.66e-08
	_cons	|	0.92647	0.106847	8.67	0	0.713422	1.13952
Q112		|
	Ind1	|	-4.51e-05	0.0041553	-0.01	0.991	-0.0083306	0.0082403
	Ind2	|	0.0003003	0.000292	1.03	0.307	-0.000282	0.0008825
	Ind3	|	-0.000303	0.0001952	-1.55	0.125	-0.0006921	8.62e-05
	Ind4	|	0.0001273	0.0001876	0.68	0.5	-0.0002467	0.0005013
	Ind5	|	-0.0046166	0.0288097	-0.16	0.873	-0.0620615	0.0528283
	Ind6	|	-1.43e-09	1.73e-09	-0.82	0.413	-4.88e-09	2.03e-09
	Ind7	|	-0.0045922	0.0043582	-1.05	0.296	-0.0132823	0.0040979
	Ind8	|	-1.8e-09	3.01e-08	-0.06	0.952	-6.17e-08	5.81e-08
	_cons	|	0.324326	0.197695	1.64	0.105	-0.0698665	0.718518
Q121		|
	Ind1	|	0.0007781	0.003355	0.23	0.817	-0.0059115	0.0074677
	Ind2	|	1.15e-05	0.0002358	0.05	0.961	-0.0004586	0.0004816
	Ind3	|	-0.0001953	0.0001576	-1.24	0.219	-0.0005094	0.0001189
	Ind4	|	0.0001592	0.0001514	1.05	0.297	-0.0001428	0.0004611
	Ind5	|	0.0401292	0.0232607	1.73	0.089	-0.0062513	0.0865097
	Ind6	|	6.14e-10	1.4e-09	0.44	0.662	-2.17e-09	3.4e-09
	Ind7	|	0.0027167	0.0035188	0.77	0.443	-0.0042996	0.009733
	Ind8	|	1.7e-08	2.43e-08	0.7	0.485	-3.14e-08	6.54e-08
	_cons	|	0.639018	0.159617	4	0	0.320751	0.957285
Q122		|
	Ind1	|	-0.0018326	0.004205	-0.44	0.664	-0.0102171	0.006552
	Ind2	|	0.0004307	0.0002955	1.46	0.149	-0.0001586	0.0010199
	Ind3	|	-0.0003986	0.0001975	-2.02	0.047	-0.0007924	-4.78e-06
	Ind4	|	0.000122	0.0001898	0.64	0.522	-0.0002565	0.0005005
	Ind5	|	0.0173838	0.0291543	0.6	0.553	-0.0407482	0.0755159
	Ind6	|	-8.5e-10	1.75e-09	-0.48	0.629	-4.35e-09	2.65e-09
	Ind7	|	-0.0033368	0.0044104	-0.76	0.452	-0.0121308	0.0054572
	Ind8	|	-1.23e-08	3.04e-08	-0.4	0.688	-7.29e-08	4.84e-08
	_cons	|	0.300575	0.20006	1.5	0.137	-0.0983319	0.699483
Q131		|
	Ind1	|	-0.0001953	0.00359	-0.05	0.957	-0.0073536	0.0069629
	Ind2	|	6.36e-05	0.0002523	0.25	0.802	-0.0004395	0.0005666
	Ind3	|	-0.0002196	0.0001686	-1.3	0.197	-0.0005558	0.0001166
	Ind4	|	0.0001454	0.000162	0.9	0.373	-0.0001777	0.0004685
	Ind5	|	0.0536172	0.0248903	2.15	0.035	0.0039874	0.103247
	Ind6	|	1.26e-10	1.5e-09	0.08	0.933	-2.86e-09	3.11e-09
	Ind7	|	0.0034046	0.0037653	0.9	0.369	-0.0041032	0.0109124
	Ind8	|	-2.96e-08	2.6e-08	-1.14	0.259	-8.13e-08	2.22e-08
	_cons	|	0.577836	0.170799	3.38	0.001	0.237272	0.918401
Q132		|
	Ind1	|	-0.0019503	0.004027	-0.48	0.63	-0.00998	0.0060793
	Ind2	|	0.0002814	0.000283	0.99	0.323	-0.0002829	0.0008457
	Ind3	|	-0.0001637	0.0001891	-0.87	0.39	-0.0005408	0.0002134
	Ind4	|	-4.21e-05	0.0001818	-0.23	0.818	-0.0004045	0.0003204
	Ind5	|	0.0277403	0.0279203	0.99	0.324	-0.0279313	0.0834119
	Ind6	|	-6.19e-10	1.68e-09	-0.37	0.713	-3.97e-09	2.73e-09
	Ind7	|	-0.0033438	0.0042237	-0.79	0.431	-0.0117656	0.005078
	Ind8	|	-1.04e-08	2.91e-08	-0.36	0.723	-6.85e-08	4.77e-08
	_cons	|	0.181203	0.191592	0.95	0.347	-0.20082	0.563226
Q141		|
	Ind1	|	-0.0006455	0.0035087	-0.18	0.855	-0.0076416	0.0063507
	Ind2	|	0.000424	0.0002466	1.72	0.09	-6.77e-05	0.0009156
	Ind3	|	-0.0003824	0.0001648	-2.32	0.023	-0.0007109	-5.38e-05
	Ind4	|	3.43e-05	0.0001584	0.22	0.829	-0.0002815	0.0003501
	Ind5	|	0.0434103	0.0243267	1.78	0.079	-0.0050957	0.0919163
	Ind6	|	7.96e-10	1.46e-09	0.54	0.588	-2.12e-09	3.71e-09
	Ind7	|	0.0033203	0.0036801	0.9	0.37	-0.0040175	0.0106581
	Ind8	|	1.82e-08	2.54e-08	0.72	0.475	-3.24e-08	6.89e-08
	_cons	|	0.681248	0.166932	4.08	0	0.348396	1.0141
Q142		|
	Ind1	|	-0.0037077	0.0041094	-0.9	0.37	-0.0119015	0.0044861
	Ind2	|	0.0004764	0.0002888	1.65	0.103	-9.95e-05	0.0010522
	Ind3	|	-0.0004053	0.000193	-2.1	0.039	-0.0007901	-2.05e-05
	Ind4	|	0.0001056	0.0001855	0.57	0.571	-0.0002643	0.0004754
	Ind5	|	0.0243084	0.0284911	0.85	0.396	-0.0325013	0.0811181
	Ind6	|	-4.99e-10	1.71e-09	-0.29	0.772	-3.91e-09	2.92e-09
	Ind7	|	-0.0022253	0.00431	-0.52	0.607	-0.0108193	0.0063687
	Ind8	|	-1.67e-08	2.97e-08	-0.56	0.575	-7.6e-08	4.25e-08
	_cons	|	0.320455	0.195509	1.64	0.106	-0.0693782	0.710288
Q151		|
	Ind1	|	0.0076328	0.0046701	1.63	0.107	-0.001679	0.0169447
	Ind2	|	0.0001462	0.0003282	0.45	0.657	-0.0005082	0.0008006
	Ind3	|	-0.000466	0.0002193	-2.12	0.037	-0.0009033	-2.86e-05
	Ind4	|	0.0003351	0.0002108	1.59	0.116	-8.53e-05	0.0007554
	Ind5	|	0.0023576	0.0323786	0.07	0.942	-0.0622034	0.0669187
	Ind6	|	8.21e-10	1.95e-09	0.42	0.674	-3.06e-09	4.7e-09
	Ind7	|	-0.0081008	0.0048981	-1.65	0.103	-0.0178674	0.0016658
	Ind8	|	5.1e-08	3.38e-08	1.51	0.136	-1.64e-08	1.18e-07
	_cons	|	0.359373	0.222185	1.62	0.11	-0.0836506	0.802396
Q152		|
	Ind1	|	-0.0026781	0.0047744	-0.56	0.577	-0.012198	0.0068418
	Ind2	|	0.0005239	0.0003355	1.56	0.123	-0.0001451	0.001193
	Ind3	|	-0.0003482	0.0002242	-1.55	0.125	-0.0007953	9.89e-05
	Ind4	|	8.57e-06	0.0002155	0.04	0.968	-0.0004212	0.0004383
	Ind5	|	0.0161784	0.0331021	0.49	0.627	-0.0498253	0.082182
	Ind6	|	1.16e-09	1.99e-09	0.58	0.561	-2.81e-09	5.13e-09
	Ind7	|	-0.0070927	0.0050076	-1.42	0.161	-0.0170775	0.0028921
	Ind8	|	2.37e-08	3.45e-08	0.69	0.494	-4.51e-08	9.26e-08
	_cons	|	0.477295	0.227149	2.1	0.039	0.0243722	0.930218
Q161		|
	Ind1	|	0.0088369	0.0046204	1.91	0.06	-0.000376	0.0180497
	Ind2	|	0.0001355	0.0003247	0.42	0.678	-0.0005119	0.000783
	Ind3	|	-0.0004748	0.000217	-2.19	0.032	-0.0009074	-4.21e-05
	Ind4	|	0.0003221	0.0002086	1.54	0.127	-9.38e-05	0.000738
	Ind5	|	0.0199503	0.0320345	0.62	0.535	-0.0439247	0.0838252
	Ind6	|	7.26e-10	1.93e-09	0.38	0.707	-3.11e-09	4.57e-09
	Ind7	|	-0.0080379	0.0048461	-1.66	0.102	-0.0177007	0.0016248
	Ind8	|	4.31e-08	3.34e-08	1.29	0.201	-2.35e-08	1.1e-07
	_cons	|	0.218835	0.219824	1	0.323	-0.21948	0.657151
Q162		|
	Ind1	|	-0.0059498	0.0046076	-1.29	0.201	-0.0151371	0.0032375
	Ind2	|	0.000609	0.0003238	1.88	0.064	-3.67e-05	0.0012546
	Ind3	|	-0.0003053	0.0002164	-1.41	0.163	-0.0007368	0.0001262
	Ind4	|	-7.89e-05	0.000208	-0.38	0.705	-0.0004936	0.0003358
	Ind5	|	0.0282778	0.0319456	0.89	0.379	-0.0354199	0.0919754
	Ind6	|	-1.75e-09	1.92e-09	-0.91	0.365	-5.58e-09	2.08e-09
	Ind7	|	-0.0058939	0.0048326	-1.22	0.227	-0.0155299	0.0037421
	Ind8	|	3.13e-08	3.33e-08	0.94	0.351	-3.52e-08	9.77e-08
	_cons	|	0.514709	0.219213	2.35	0.022	0.0776105	0.951808
Q2		|
	Ind1	|	-0.002826	0.0053069	-0.53	0.597	-0.0134905	0.0078385
	Ind2	|	0.0005589	0.0003603	1.55	0.127	-0.000165	0.0012829
	Ind3	|	-0.0001175	0.0003393	-0.35	0.731	-0.0007994	0.0005644
	Ind4	|	-9.57e-05	0.0002212	-0.43	0.667	-0.0005402	0.0003487
	Ind5	|	-0.0119013	0.0359726	-0.33	0.742	-0.0841911	0.0603884
	Ind6	|	-2.19e-09	5.4e-09	-0.41	0.687	-1.3e-08	8.66e-09
	Ind7	|	-0.0001423	0.0058715	-0.02	0.981	-0.0119415	0.0116569
	Ind8	|	-2.35e-08	4.95e-08	-0.48	0.636	-1.23e-07	7.59e-08
	_cons	|	0.700707	0.311534	2.25	0.029	0.0746561	1.32676
Q31		|
	Ind1	|	0.0006487	0.0041644	0.16	0.877	-0.0077201	0.0090174
	Ind2	|	-0.0003224	0.0002827	-1.14	0.26	-0.0008906	0.0002457
	Ind3	|	0.0003089	0.0002663	1.16	0.252	-0.0002262	0.000844
	Ind4	|	-0.0002114	0.0001736	-1.22	0.229	-0.0005602	0.0001374
	Ind5	|	0.039031	0.0282287	1.38	0.173	-0.0176967	0.0957587
	Ind6	|	5.58e-09	4.24e-09	1.32	0.194	-2.94e-09	1.41e-08
	Ind7	|	-0.0082771	0.0046075	-1.8	0.079	-0.0175363	0.0009821
	Ind8	|	-5.48e-08	3.88e-08	-1.41	0.165	-1.33e-07	2.33e-08
	_cons	|	0.57952	0.244469	2.37	0.022	0.0882411	1.0708
Q32		|
	Ind1	|	0.0010407	0.003852	0.27	0.788	-0.0067002	0.0087815
	Ind2	|	-0.0003833	0.0002615	-1.47	0.149	-0.0009088	0.0001422
	Ind3	|	0.0003937	0.0002463	1.6	0.116	-0.0001013	0.0008887
	Ind4	|	-0.0002773	0.0001605	-1.73	0.09	-0.0005999	4.53e-05
	Ind5	|	0.0501781	0.0261107	1.92	0.06	-0.0022934	0.10265
	Ind6	|	4.99e-09	3.92e-09	1.27	0.209	-2.89e-09	1.29e-08
	Ind7	|	-0.0086679	0.0042618	-2.03	0.047	-0.0172323	-0.0001034
	Ind8	|	-6.15e-08	3.59e-08	-1.71	0.093	-1.34e-07	1.07e-08
	_cons	|	0.506601	0.226127	2.24	0.03	0.0521827	0.96102
Q33		|
	Ind1	|	0.0010407	0.003852	0.27	0.788	-0.0067002	0.0087815
	Ind2	|	-0.0003833	0.0002615	-1.47	0.149	-0.0009088	0.0001422
	Ind3	|	0.0003937	0.0002463	1.6	0.116	-0.0001013	0.0008887
	Ind4	|	-0.0002773	0.0001605	-1.73	0.09	-0.0005999	4.53e-05
	Ind5	|	0.0501781	0.0261107	1.92	0.06	-0.0022934	0.10265
	Ind6	|	4.99e-09	3.92e-09	1.27	0.209	-2.89e-09	1.29e-08
	Ind7	|	-0.0086679	0.0042618	-2.03	0.047	-0.0172323	-0.0001034
	Ind8	|	-6.15e-08	3.59e-08	-1.71	0.093	-1.34e-07	1.07e-08
	_cons	|	0.506601	0.226127	2.24	0.03	0.0521827	0.96102
Q34		|
	Ind1	|	0.0012662	0.0050831	0.25	0.804	-0.0089487	0.0114811
	Ind2	|	0.0005161	0.0003451	1.5	0.141	-0.0001773	0.0012096
	Ind3	|	-0.0004992	0.000325	-1.54	0.131	-0.0011524	0.000154
	Ind4	|	0.0003367	0.0002118	1.59	0.118	-8.9e-05	0.0007624
	Ind5	|	-0.0413575	0.034456	-1.2	0.236	-0.1106	0.0278845
	Ind6	|	-2.87e-09	5.17e-09	-0.55	0.582	-1.33e-08	7.53e-09
	Ind7	|	0.0038193	0.005624	0.68	0.5	-0.0074825	0.015121
	Ind8	|	7.32e-09	4.74e-08	0.15	0.878	-8.79e-08	1.03e-07
	_cons	|	0.48026	0.298399	1.61	0.114	-0.119397	1.07992
Q4		|
	Ind1	|	-0.0009046	0.0055446	-0.16	0.871	-0.012047	0.0102377
	Ind2	|	-7.15e-05	0.0003764	-0.19	0.85	-0.000828	0.0006849
	Ind3	|	-0.0001135	0.0003545	-0.32	0.75	-0.000826	0.0005989
	Ind4	|	0.0001296	0.0002311	0.56	0.577	-0.0003347	0.000594
	Ind5	|	0.0053101	0.0375844	0.14	0.888	-0.0702186	0.0808387
	Ind6	|	9.49e-09	5.64e-09	1.68	0.099	-1.85e-09	2.08e-08
	Ind7	|	-0.0077913	0.0061346	-1.27	0.21	-0.0201191	0.0045366
	Ind8	|	-4.28e-08	5.17e-08	-0.83	0.412	-1.47e-07	6.12e-08
	_cons	|	0.595301	0.325492	1.83	0.073	-0.0587995	1.2494
Q5		|
	Ind1	|	0.0040286	0.0043318	0.93	0.357	-0.0046764	0.0127336
	Ind2	|	0.0002122	0.0002941	0.72	0.474	-0.0003787	0.0008032
	Ind3	|	-0.0005503	0.000277	-1.99	0.053	-0.001107	6.29e-06
	Ind4	|	0.0003565	0.0001805	1.97	0.054	-6.26e-06	0.0007193
	Ind5	|	0.0293268	0.0293629	1	0.323	-0.0296801	0.0883338
	Ind6	|	2.12e-09	4.41e-09	0.48	0.632	-6.74e-09	1.1e-08
	Ind7	|	-0.0067339	0.0047926	-1.41	0.166	-0.0163651	0.0028972
	Ind8	|	1.25e-08	4.04e-08	0.31	0.758	-6.86e-08	9.37e-08
	_cons	|	0.622241	0.254291	2.45	0.018	0.111224	1.13326
Q6		|
	Ind1	|	0.0002612	0.0032185	0.08	0.936	-0.0062066	0.0067289
	Ind2	|	8.6e-05	0.0002185	0.39	0.696	-0.0003531	0.000525
	Ind3	|	-0.0001223	0.0002058	-0.59	0.555	-0.0005359	0.0002913
	Ind4	|	8.64e-05	0.0001341	0.64	0.522	-0.0001831	0.0003559
	Ind5	|	0.0051424	0.0218164	0.24	0.815	-0.0386993	0.0489841
	Ind6	|	-2.4e-09	3.28e-09	-0.73	0.468	-8.98e-09	4.19e-09
	Ind7	|	0.0025117	0.0035609	0.71	0.484	-0.0046442	0.0096676
	Ind8	|	2.24e-08	3e-08	0.75	0.46	-3.8e-08	8.27e-08
	_cons	|	0.875225	0.188937	4.63	0	0.495543	1.25491
Q7		|
	Ind1	|	0.0022356	0.0043492	0.51	0.61	-0.0065044	0.0109756
	Ind2	|	-5.92e-05	0.0002953	-0.2	0.842	-0.0006525	0.0005342
	Ind3	|	2.99e-05	0.0002781	0.11	0.915	-0.000529	0.0005887
	Ind4	|	2.81e-06	0.0001813	0.02	0.988	-0.0003614	0.0003671
	Ind5	|	0.0065022	0.029481	0.22	0.826	-0.0527421	0.0657466
	Ind6	|	2.72e-11	4.43e-09	0.01	0.995	-8.87e-09	8.92e-09
	Ind7	|	-0.0055433	0.0048119	-1.15	0.255	-0.0152132	0.0041266
	Ind8	|	-7.34e-10	4.06e-08	-0.02	0.986	-8.22e-08	8.08e-08
	_cons	|	0.0542731	0.255314	0.21	0.833	-0.458801	0.567347
Q8		|
	Ind1	|	0.0035837	0.0019067	1.88	0.066	-0.0002478	0.0074153
	Ind2	|	-0.0001791	0.0001294	-1.38	0.173	-0.0004392	8.1e-05
	Ind3	|	-1.3e-05	0.0001219	-0.11	0.915	-0.000258	0.000232
	Ind4	|	4.7e-05	7.95e-05	0.59	0.557	-0.0001127	0.0002066
	Ind5	|	0.0273512	0.0129243	2.12	0.039	0.0013789	0.0533234
	Ind6	|	7.52e-10	1.94e-09	0.39	0.7	-3.15e-09	4.65e-09
	Ind7	|	-0.0003599	0.0021095	-0.17	0.865	-0.0045991	0.0038793
	Ind8	|	-2.22e-08	1.78e-08	-1.25	0.217	-5.79e-08	1.35e-08
	_cons	|	-0.244672	0.111928	-2.19	0.034	-0.4696	-0.0197446
Q91		|
	Ind1	|	-0.00037	0.001509	-0.25	0.807	-0.0034024	0.0026624
	Ind2	|	2.96e-05	0.0001024	0.29	0.774	-0.0001763	0.0002354
	Ind3	|	-2.13e-06	9.65e-05	-0.02	0.983	-0.000196	0.0001918
	Ind4	|	3.15e-06	6.29e-05	0.05	0.96	-0.0001232	0.0001295
	Ind5	|	-0.0093752	0.0102285	-0.92	0.364	-0.0299302	0.0111798
	Ind6	|	3.72e-10	1.54e-09	0.24	0.81	-2.71e-09	3.46e-09
	Ind7	|	0.0004754	0.0016695	0.28	0.777	-0.0028796	0.0038304
	Ind8	|	1.7e-09	1.41e-08	0.12	0.905	-2.66e-08	3e-08
	_cons	|	1.03859	0.0885822	11.72	0	0.860574	1.2166
Q92		|
	Ind1	|	0.002848	0.0038658	0.74	0.465	-0.0049205	0.0106165
	Ind2	|	0.0005395	0.0002624	2.06	0.045	1.21e-05	0.0010669
	Ind3	|	-0.0004921	0.0002472	-1.99	0.052	-0.0009888	4.69e-06
	Ind4	|	0.0002581	0.0001611	1.6	0.116	-6.56e-05	0.0005819
	Ind5	|	-0.0402773	0.0262041	-1.54	0.131	-0.0929363	0.0123817
	Ind6	|	-4.82e-09	3.93e-09	-1.23	0.226	-1.27e-08	3.08e-09
	Ind7	|	-0.0030686	0.0042771	-0.72	0.476	-0.0116637	0.0055265
	Ind8	|	7.86e-08	3.6e-08	2.18	0.034	6.18e-09	1.51e-07
	_cons	|	0.32553	0.226935	1.43	0.158	-0.130513	0.781573
Q101		|
	Ind1	|	0.0010334	0.0024958	0.41	0.681	-0.0039821	0.0060489
	Ind2	|	6.16e-05	0.0001694	0.36	0.718	-0.0002789	0.0004021
	Ind3	|	-0.0002038	0.0001596	-1.28	0.208	-0.0005245	0.0001169
	Ind4	|	0.0001559	0.000104	1.5	0.14	-5.31e-05	0.0003649
	Ind5	|	0.009134	0.0169179	0.54	0.592	-0.0248638	0.0431317
	Ind6	|	-1.97e-09	2.54e-09	-0.78	0.441	-7.08e-09	3.13e-09
	Ind7	|	0.0010516	0.0027614	0.38	0.705	-0.0044975	0.0066008
	Ind8	|	1.13e-08	2.33e-08	0.49	0.629	-3.55e-08	5.81e-08
	_cons	|	0.899459	0.146514	6.14	0	0.605028	1.19389
Q102		|
	Ind1	|	0.0038489	0.0038998	0.99	0.329	-0.0039879	0.0116858
	Ind2	|	8.08e-05	0.0002647	0.31	0.761	-0.0004512	0.0006129
	Ind3	|	-8.43e-05	0.0002494	-0.34	0.737	-0.0005854	0.0004168
	Ind4	|	4.46e-05	0.0001625	0.27	0.785	-0.000282	0.0003712
	Ind5	|	-0.0203657	0.0264346	-0.77	0.445	-0.073488	0.0327566
	Ind6	|	-4.55e-09	3.97e-09	-1.15	0.257	-1.25e-08	3.42e-09
	Ind7	|	-0.0023268	0.0043147	-0.54	0.592	-0.0109975	0.0063438
	Ind8	|	3.55e-08	3.64e-08	0.98	0.334	-3.76e-08	1.09e-07
	_cons	|	0.124208	0.228931	0.54	0.59	-0.335846	0.584263
GPOC NEC Suppl Table 3: Details with r.

## Sheet: GPOC NEC Suppl Table 4 clusters
Variables Clusters	Question	Yes	Neutral	No
General and Demographic	Q2	68.54	0	31.46
	Q3.1	73.03	17.23	9.74
	Q3.2	66.67	25.09	8.24
	Q3.3	69.29	23.22	7.49
	Q3.4	22.47	32.21	45.32
Privacy	Q4	35.96	29.59	34.46
	Q5	64.04	23.22	12.73
	Q6	88.76	5.99	5.24
companies using records	Q7	16.1	13.48	70.41
	Q8	3.37	5.99	90.64
Medical Research	Q9.1	92.88	4.49	2.62
	Q9.2	10.49	10.11	79.4
	Q10.1	88.01	6.74	5.24
	Q10.2	10.49	9.36	80.15
	Q11.1	91.01	5.24	3.75
	Q11.2	16.48	15.36	68.16
	Q12.1	85.02	7.49	7.49
	Q12.2	12.73	20.97	66.29
	Q13.1	80.52	6.74	12.73
	Q13.2	9.74	20.22	70.04
	Q14.1	85.02	6.37	8.61
	Q14.2	11.99	26.59	61.42
	Q15.1	43.82	29.96	26.22
	Q15.2	24.34	34.83	40.82
	Q16.1	47.19	25.84	26.97
	Q16.2	20.6	33.33	46.07
	Q17.1	44.19	29.96	25.84
	Q17.2	28.46	40.45	31.09
Non-Medical Research	Q18.1	66.67	12.36	20.97
	Q18.2	6.74	7.49	85.77
	Q19.1	60.3	14.98	24.72
	Q19.2	7.12	22.47	70.41
	Q20.1	45.69	20.97	33.33
	Q20.2	11.99	25.47	62.55
Co-Ownership	Q21	89.14	5.99	4.87
	Q22	77.53	9.36	13.11
	Q23	85.39	7.87	6.74
Data Sharing	Q24	78.65	8.61	12.73
	Q26	64.42	20.22	15.36
Movement of the record	Q27	83.9	10.86	5.24
Centeralized ownership	Q28	16.1	20.22	63.67
	Q29	3.75	3	93.26
	Q30	16.85	14.23	68.91
Rights	Q31	61.8	22.85	15.36
	Q32	79.03	14.23	6.74
	Q33	70.79	18.35	10.86
Creation of a Foundation	Q34	72.66	17.6	9.74
	Q35	74.53	19.1	6.37
	Q36	75.28	17.23	7.49
Protection of Environement	Q37	84.27	11.99	3.75
	Q38	73.41	23.22	3.37
GPOC NEC Suppl Table 4: Illustrates the clusters.

## Sheet: GPOC NEC Figure 1
Question	Yes	Neutral	No
Q2	68.54	0	31.46
Q3.1	73.03	17.23	9.74
Q3.2	66.67	25.09	8.24
Q3.3	69.29	23.22	7.49
Q3.4	22.47	32.21	45.32
Q4	35.96	29.59	34.46
Q5	64.04	23.22	12.73
Q6	88.76	5.99	5.24
Q7	16.1	13.48	70.41
Q8	3.37	5.99	90.64
Q9.1	92.88	4.49	2.62
Q9.2	10.49	10.11	79.4
Q10.1	88.01	6.74	5.24
Q10.2	10.49	9.36	80.15
Q11.1	91.01	5.24	3.75
Q11.2	16.48	15.36	68.16
Q12.1	85.02	7.49	7.49
Q12.2	12.73	20.97	66.29
Q13.1	80.52	6.74	12.73
Q13.2	9.74	20.22	70.04
Q14.1	85.02	6.37	8.61
Q14.2	11.99	26.59	61.42
Q15.1	43.82	29.96	26.22
Q15.2	24.34	34.83	40.82
Q16.1	47.19	25.84	26.97
Q16.2	20.6	33.33	46.07
Q17.1	44.19	29.96	25.84
Q17.2	28.46	40.45	31.09
Q18.1	66.67	12.36	20.97
Q18.2	6.74	7.49	85.77
Q19.1	60.3	14.98	24.72
Q19.2	7.12	22.47	70.41
Q20.1	45.69	20.97	33.33
Q20.2	11.99	25.47	62.55
Q21	89.14	5.99	4.87
Q22	77.53	9.36	13.11
Q23	85.39	7.87	6.74
Q24	78.65	8.61	12.73
Q26	64.42	20.22	15.36
Q27	83.9	10.86	5.24
Q28	16.1	20.22	63.67
Q29	3.75	3	93.26
Q30	16.85	14.23	68.91
Q31	61.8	22.85	15.36
Q32	79.03	14.23	6.74
Q33	70.79	18.35	10.86
Q34	72.66	17.6	9.74
Q35	74.53	19.1	6.37
Q36	75.28	17.23	7.49
Q37	84.27	11.99	3.75
Q38	73.41	23.22	3.37
GPOC NEC Figurer 1 background data, see GPOC Necessity article figure 1.

## Sheet: GPOC ECO SupplTab1_LogicGateAn
comparison		RMSE RanK			R-sq Rank
Top 5		Q25				Q32
		Q4				Q33
		Q172				Q8
		Q171				Q111
		Q152				Q31				Strongly Significant (linked directly with same group/groups)
										Significant (linked directly with other group/groups)
Top 10		Q2				Q161				low Significant (linked indirectly with other group/groups)
		Q201				Q92				Strongly inSignificant (unlinked directly/indirectly with any group/groups)
		Q151				Q5
		Q161				Q34
		Q162				Q151
Top 15		Q34				Q141
		Q191				Q201
		Q181				Q23
		Q122				Q2
		Q112				Q171
Top 20		Q142				Q4
		Q202				Q181
		Q28				Q131
		Q30				Q121
		Q132				Q162
Top 25		Q26				Q202
		Q7				Q27
		Q5				Q25
		Q31				Q191
		Q131				Q142
GPOC ECO: Suppl Table 1: Illiustrates Logic Gate An.

## Sheet: GPOC ECO Supp_Table 2_VarDef
Variables Category	INDICATOR_NAME	Definition	SOURCE_ORGANIZATION and Source
Demographic / General	ID	ID
	Q1.Country/Organization	Q1.Which country or international organisation do you represent?
Response Modelling	R1	Response Category (country - Org)
	R2	R.Response weight
Survey Strata DATA Questionaire (Categorical - Binary)	Q2	Q2. I have seen my personal health record.
	Q3.1	Q3.1. I have experienced that having access to my own/my family's medical information has:resulted in better healthcare insights.
	Q3.2	Q3.2. I have experienced that having access to my own/my family's medical information has:facilitated effective diagnosis
	Q3.3	Q3.3. I have experienced that having access to my own/my family's medical information has:facilitated effective treatment
	Q3.4	Q3.4. I have experienced that having access to my own/my family's medical information has:I have never experienced this.
	Q4	Q4. I have been able to observe incorrect information in my own/family’s medical record
	Q5	Q5. have sometimes felt that I would like to correct or comment or ask for clarifications in my medical record
	Q6	Q6. I would like to know if someone has illegally accessed or tampered with my medical record without my consent, and who that person is
	Q7	Q7. I think that tech giants should be able to use facts in my medical records as much as they intend
	Q8	Q8. Companies should be able to use my medical records to earn money, without paying me or letting me know
	Q9.1	Q9.1. I would be willing to allow medical research (clinical) using my medical record - if I consented.: With Consent
	Q9.2	Q9.2. I would be willing to allow medical research (clinical) using my medical record - if I consented.: Without Consent
	Q10.1	Q10.1. I would be willing to allow medical research (pharmaceutical) using my medical record - if I consented.: With Consent
	Q10.2	Q10.2. I would be willing to allow medical research (pharmaceutical) using my medical record - if I consented.: Without Consent
	Q11.1	Q11.1. I would be willing to allow medical research (public health) using my medical record - if I consented.: With Consent
	Q11.2	Q11.2. I would be willing to allow medical research (public health) using my medical record - if I consented.: Without Consent
	Q12.1	Q12.1. I would be willing to allow medical research (clinical) using my medical record - if my details were kept anonymously.: Anonymous
	Q12.2	Q12.2. I would be willing to allow medical research (clinical) using my medical record - if my details were kept anonymously. Indifferent
	Q13.1	Q13.1. I would be willing to allow medical research (pharmaceutical) using my medical record - if my details were kept anonymously.: Anonymous
	Q13.2	Q13.2. I would be willing to allow medical research (pharmaceutical) using my medical record - if my details were kept anonymously.: Indifferent
	Q14.1	Q14.1.I would be willing to allow medical research (public health) using my medical record - if my details were kept anonymously.: Anonymous
	Q14.2	Q14.2. I would be willing to allow medical research (public health) using my medical record - if my details were kept anonymously.: Indifferent3
	Q15.1	Q15.1. I would be willing to allow medical research (clinical) using my medical record - if I got paid for it.: Paid
	Q15.2	Q15.2. I would be willing to allow medical research (clinical) using my medical record - if I got paid for it.: Unpaid
	Q16.1	Q16.1. I would be willing to allow medical research (pharmaceutical) using my medical record - if I got paid for it.: Paid
	Q16.2	Q16.2. I would be willing to allow medical research (pharmaceutical) using my medical record - if I got paid for it.: Unpaid2
	Q17.1	Q17.1. I would be willing to allow medical research (public health) using my medical record - if I got paid for it.: Paid
	Q17.2	Q17.2. I would be willing to allow medical research (public health) using my medical record - if I got paid for it.: Unpaid
	Q18.1	Q18.1. I would be willing to allow non-medical research (e.g. consumer product design) using my medical record - if I consented.: With consent
	Q18.2	Q18.2. I would be willing to allow non-medical research (e.g. consumer product design) using my medical record - if I consented.: Without consent
	Q19.1	Q19.1. I would be willing to allow non-medical research (e.g. consumer product design) using my medical record - if my details were kept anonymously.: Anonymous
	Q19.2	Q19.2. I would be willing to allow non-medical research (e.g. consumer product design) using my medical record - if my details were kept anonymously.: Indifferent
	Q20.1	Q20.1. I would be willing to allow non-medical research (e.g. consumer product design) using my medical record - if I got paid for it.: Paid
	Q20.2	Q20.2. I would be willing to allow non-medical research (e.g. consumer product design) using my medical record - if I got paid for it.: Unpaid3
	Q21	Q21. I think it is my human right to co-own my medical record with my healthcare provider's at my home country
	Q22	Q22. I think it is my human right to co-own my medical record with the government
	Q23	Q23. I think it is my human right to co-own my medical record, to gain insights
	Q24	Q24. I think it is my human right to co-own my medical record and share it globally with those I deem relevant
	Q25	Q25. I would like to share my medical records with (Doctor at my home country(1), Doctor and healthcare providers abroad when travelling(2), My family member(3), My friend(4), Companies(5), A legally appointed representative, e.g. lasting power of attorney(6)
	Q26	Q26. I think everyone should share their medical records for research for free, if kept anonymous, for humanity
	Q27	Q27. I think that medical information should accompany/follow patients as a co-owned asset, wherever they move in the world – e.g. on travel, or if the individual becomes displaced as a refugee
	Q28	Q28. I think states should own my medical records
	Q29	Q29. I think states should own my medical records and sell it to whomever they like
	Q30	Q30. I think states should own my medical records and sell it to whomever they like, ONLY if it generates additional revenue that can be invested into healthcare provision for citizens
	Q31	Q31. I think a global, non-commercial, large and secure cloud, where I co-own my medical record would be an interesting concept
	Q32	Q32. I think it ought to be possible to globally balance the legal rights and regulations about medical records and find a common ground, and that this would benefit health in general
	Q33	Q33. I think I personally would benefit from global access and co-ownership and control of my medical records
	Q34	Q34. A 3 unbiased, decentralised foundation, co-owned by you as a patient, designed to help regulate the flow of your medical information, is something that would be of interest to me
	Q35	Q35. An infrastructure based on sound scientific and econometric models, with the involvement of patients, governments and institutions from all countries would be worthwhile
	Q36	Q36. An infrastructure designed by global academics supported by research institutions with the involvement of patients, government and companies, could be founded
	Q37	Q37. I think an electronic health record can be more environmentally sustainable
	Q38	Q38. I think a global patient co-owned cloud can be more ecologically advantageous and environmentally sustainable
Adjusted Model Indicators	Ind1	Domestic general government health expenditure (% of current health expenditure) Share of current health expenditures funded from domestic public sources for health. Domestic public sources include domestic revenue as internal transfers and grants, transfers, subsidies to voluntary health insurance beneficiaries, non-profit institutions serving households (NPISH) or enterprise financing schemes a…
	Ind2	Domestic general government health expenditure per capita, PPP (current international B$) Public expenditure on health from domestic sources per capita expressed in international dollars at purchasing power parity.
	Ind3	Current health expenditure per capita, PPP (current international $)
	Ind4	Current health expenditure per capita (current US$) Current expenditures on health per capita in current US dollars. Estimates of current health expenditures include healthcare goods and services consumed during each year.
	Ind5	Current health expenditure (% of GDP) Level of current health expenditure expressed as a percentage of GDP. Estimates of current health expenditures include healthcare goods and services consumed during each year. This indicator does not include capital health expenditures such as buildings, machinery, IT and stocks of vaccines for emergency or outbreaks.
	Ind6	International migrant stock, total, International migrant stock is the number of people born in a country other than that in which they live. It also includes refugees. The data used to estimate the international migrant stock at a particular time are obtained mainly from population censuses. The estimates are derived from the data on foreign-born population--people who have residence in one coun…
	Ind7	International migrant stock (% of population) International migrant stock is the number of people born in a country other than that in which they live. It also includes refugees. The data used to estimate the international migrant stock at a particular time are obtained mainly from population censuses. The estimates are derived from the data on foreign-born population--people who have residence i…
	Ind8	Net migration, Net migration is the net total of migrants during the period, that is, the total number of immigrants less the annual number of emigrants, including both citizens and noncitizens. Data are five-year estimates.
	Ind9	Population, total, Total population is based on the de facto definition of population, which counts all residents regardless of legal status or citizenship. The values shown are midyear estimates.
	Ind10	GDP (current US$) GDP at purchaser's prices is the sum of gross value added by all resident producers in the economy plus any product taxes and minus any subsidies not included in the value of the products. It is calculated without making deductions for depreciation of fabricated assets or for depletion and degradation of natural resources. Data are in current U.S. dollars. Dollar figures for GDP…
	Ind11	GDP (current BillionUS$) Adjusted share GDP at purchaser's prices is the sum of gross value added by all resident producers in the economy plus any product taxes and minus any subsidies not included in the value of the products. It is calculated without making deductions for depreciation of fabricated assets or for depletion and degradation of natural resources. Data are in current U.S. dollars. …
Combined Indicators (Adjusted US$-total Numbers)	CInd1	Refugee population by country or territory of asylum, Refugees are people who are recognized as refugees under the 1951 Convention Relating to the Status of Refugees or its 1967 Protocol, the 1969 Organization of African Unity Convention Governing the Specific Aspects of Refugee Problems in Africa, people recognized as refugees in accordance with the UNHCR statute, people granted refugee-like hum…
	Cind2	Refugee population by country or territory of origin, Refugees are people who are recognized as refugees under the 1951 Convention Relating to the Status of Refugees or its 1967 Protocol, the 1969 Organization of African Unity Convention Governing the Specific Aspects of Refugee Problems in Africa, people recognized as refugees in accordance with the UNHCR statute, people granted refugee-like hum…
	Cind3	Refugees and Migrants Integration to HIS total (country of Asylum)
	Cind4	Refugees and Migrants Integration to HIS total (Home country)
	Cind5	Refugees and Migrants Domestic Healthcare Expendtures (%GDP-PPP)
	Cind6	Refugees and Migrants International (current) Healthcare Expendtures(%GDP-ppp)
	Cind7	Economic Burden of Healthcare Integration(Refugees and Migrants) (%GDP-Healthcare Bill)
	Cind8	Refugees and Migrants Access to subsidized Healthcare services)
	Cind9	Economic Burden of Transferred/Infictous Diseases(%GDP)
Optimized Model Indicators to Economiclly Qualify and Join GPOC GDP(1960-2050)	Oind1	Optimized Domestic general government health expenditure (% of current health expenditure)
	Oind2	Optimized Domestic general government health expenditure per capita, PPP (current international B$)
	Oind3	Optimized Current health expenditure per capita, PPP (current international $)
	Oind4	Optimized Current health expenditure per capita (current US$)
	Oind5	Optimized Current health expenditure (% of GDP)
	Oind6	Optimized International migrant stock, total
	Oind7	Optimized International migrant stock (% of population)
	Oind8	Optimized Net migration
	Oind9	Optimized Population, total
	Oind10	Optimized GDP (current US$)
	Oind11	Optimized GDP (current BillionUS$)
Key
Dem Indicators	Those in Red
Economic Indicators Micro	Those in Blue
Economic Indicators Macro	Those in Green
GPOC NECO Suppl Table 2: Illustratrates VarDef

## Sheet: GPOC ECO Suppl_Table_3
classifier		GPOC Ready	GPOC Welcoming	Strongly Approaching GPOC	Moderatly approaching GPOC	Weakly Approaching GPOC	Total GPOC Compliant	Total Non-GPOC Compliant
Non-Fiscal Monetry interest Policies and Demands	GPOC Survay Score Model	15	26	67	41	38	173	94
	Compliant Percentage (%)	8.67052	15.0289	38.7283	23.6994	21.9653	0.7	0.3
	Good Covernance KPIs	0	16	62	46	48	172	95
	Compliant Percentage (%)	0	9.30233	36.0465	26.7442	27.907	0.644195	0.355805
	Extended Good Covernance KPIs	0	30	50	46	46	172	95
	Compliant Percentage (%)	0	17.4419	29.0698	26.7442	26.7442	0.644195	0.355805
	Economic, Social and Demographic profile	0	30	57	40	45	172	95
	Compliant Percentage (%)	0	17.4419	33.1395	23.2558	26.1628	0.644195	0.355052
	GPOC Coefficient Score Model	18	31	72	32	19	172	95
	Compliant Percentage (%)	10.4651	18.0233	41.8605	18.6047	11.0465	0.644195	0.358524
Fiscal Monetry Interest Policies and Demands	GPOC Survay Score Model	228	23	0	0	0	251	16
	Compliant Percentage (%)	90.8367	9.16335	0	0	0	0.644195	0.0599251
	Good Covernance KPIs	214	37	0	0	0	251	16
	Compliant Percentage (%)	85.259	14.741	0	0	0	0.944906	0.0592509
	Extended Good Covernance KPIs	151	100	0	0	0	251	16
	Compliant Percentage (%)	60.1594	39.8406	0	0	0	0.944906	0.0590936
	Economic, Social and Demographic profile	209	42	0	0	0	251	16
	Compliant Percentage (%)	83.2669	16.7331	0	0	0	0.944906	0.0599509
	GPOC Coefficient Risk Score Model	170	81	0	0	0	251	16
	Compliant Percentage (%)	67.7291	32.2709	0	0	0	0.944906	0.0599251
GPOC ECO Suppl Table 3: Illustratrates compliant percentages							3

## Sheet: GPOC ECO_Table 4_Scores_Model
GPOC Coeffiecient Model
Interactive set of Indicators to GPOC Affiliation, (Good Governance Combined Indicator)
	Score Scale		-2.5	-2	-1	0	0.32699	1	2	2.5	3	4	5	6	7	8	9	10
GPOC Survey	Dominant Indicator	Q27. I think that medical information should accompany/follow patients as a co-owned asset, wherever they move in the world – e.g. on travel, or if the individual becomes displaced as a refugee				No	Neutral	Yes
	Strong Indicator	Q31. I think a global, non-commercial, large and secure cloud, where I co-own my medical record would be an interesting concept				No	Neutral	Yes
		Q32. I think it ought to be possible to globally balance the legal rights and regulations about medical records and find a common ground, and that this would benefit health in general				No	Neutral	Yes
		Q33. I think I personally would benefit from global access and co-ownership and control of my medical records				No	Neutral	Yes
		Q34. A 3 unbiased, decentralised foundation, co-owned by you as a patient, designed to help regulate the flow of your medical information, is something that would be of interest to me				No	Neutral	Yes
		Q35. An infrastructure based on sound scientific and econometric models, with the involvement of patients, governments and institutions from all countries would be worthwhile				No	Neutral	Yes
		Q36. An infrastructure designed by global academics supported by research institutions with the involvement of patients, government and companies, could be founded				No	Neutral	Yes
		Q37. I think an electronic health record can be more environmentally sustainable				No	Neutral	Yes
		Q38. I think a global patient co-owned cloud can be more ecologically advantageous and environmentally sustainable				No	Neutral	Yes
	Moderate Indicator	Q2. I have seen my personal health record.				No	Neutral	Yes
		Q3.1. I have experienced that having access to my own/my family's medical information has:resulted in better healthcare insights.				No	Neutral	Yes
		Q3.2. I have experienced that having access to my own/my family's medical information has:facilitated effective diagnosis				No	Neutral	Yes
		Q3.3. I have experienced that having access to my own/my family's medical information has:facilitated effective treatment				No	Neutral	Yes
		Q4. I have been able to observe incorrect information in my own/family’s medical record				No	Neutral	Yes
		Q5. have sometimes felt that I would like to correct or comment or ask for clarifications in my medical record				No	Neutral	Yes
		Q6. I would like to know if someone has illegally accessed or tampered with my medical record without my consent, and who that person is				No	Neutral	Yes
		Q7. I think that tech giants should be able to use facts in my medical records as much as they intend				Yes	Neutral	No
		Q8. Companies should be able to use my medical records to earn money, without paying me or letting me know				Yes	Neutral	No
	Weak Indicator	Q18.1. I would be willing to allow non-medical research (e.g. consumer product design) using my medical record - if I consented.: With consent				No	Neutral	Yes
		Q18.2. I would be willing to allow non-medical research (e.g. consumer product design) using my medical record - if I consented.: Without consent				Yes	Neutral	No
		Q19.1. I would be willing to allow non-medical research (e.g. consumer product design) using my medical record - if my details were kept anonymously.: Anonymous				No	Neutral	Yes
		Q19.2. I would be willing to allow non-medical research (e.g. consumer product design) using my medical record - if my details were kept anonymously.: Indifferent				Yes	Neutral	No
		Q20.1. I would be willing to allow non-medical research (e.g. consumer product design) using my medical record - if I got paid for it.: Paid				No	Neutral	Yes
		Q20.2. I would be willing to allow non-medical research (e.g. consumer product design) using my medical record - if I got paid for it.: Unpaid3				Yes	Neutral	No
		Q21. I think it is my human right to co-own my medical record with my healthcare provider's at my home country				No	Neutral	Yes
		Q22. I think it is my human right to co-own my medical record with the government				No	Neutral	Yes
		Q24. I think it is my human right to co-own my medical record and share it globally with those I deem relevant				No	Neutral	Yes
		Q26. I think everyone should share their medical records for research for free, if kept anonymous, for humanity				No	Neutral	Yes
		Q28. I think states should own my medical records				Yes	Neutral	No
		Q29. I think states should own my medical records and sell it to whomever they like				Yes	Neutral	No
		Q30. I think states should own my medical records and sell it to whomever they like, ONLY if it generates additional revenue that can be invested into healthcare provision for citizens				Yes	Neutral	No
	Fiscal Interest \ Weak Indicator	Q9.1. I would be willing to allow medical research (clinical) using my medical record - if I consented.: With Consent				No	Neutral	Yes
		Q9.2. I would be willing to allow medical research (clinical) using my medical record - if I consented.: Without Consent				Yes	Neutral	No
		Q10.1. I would be willing to allow medical research (pharmaceutical) using my medical record - if I consented.: With Consent				No	Neutral	Yes
		Q10.2. I would be willing to allow medical research (pharmaceutical) using my medical record - if I consented.: Without Consent				Yes	Neutral	No
		Q11.1. I would be willing to allow medical research (public health) using my medical record - if I consented.: With Consent				No	Neutral	Yes
		Q11.2. I would be willing to allow medical research (public health) using my medical record - if I consented.: Without Consent				Yes	Neutral	No
		Q12.1. I would be willing to allow medical research (clinical) using my medical record - if my details were kept anonymously.: Anonymous				No	Neutral	Yes
		Q12.2. I would be willing to allow medical research (clinical) using my medical record - if my details were kept anonymously. Indifferent				Yes	Neutral	No
		Q13.1. I would be willing to allow medical research (pharmaceutical) using my medical record - if my details were kept anonymously.: Anonymous				No	Neutral	Yes
		Q13.2. I would be willing to allow medical research (pharmaceutical) using my medical record - if my details were kept anonymously.: Indifferent				Yes	Neutral	No
		Q14.1.I would be willing to allow medical research (public health) using my medical record - if my details were kept anonymously.: Anonymous				No	Neutral	Yes
		Q14.2. I would be willing to allow medical research (public health) using my medical record - if my details were kept anonymously.: Indifferent3				Yes	Neutral	No
		Q15.1. I would be willing to allow medical research (clinical) using my medical record - if I got paid for it.: Paid				No	Neutral	Yes
		Q15.2. I would be willing to allow medical research (clinical) using my medical record - if I got paid for it.: Unpaid				Yes	Neutral	No
		Q16.1. I would be willing to allow medical research (pharmaceutical) using my medical record - if I got paid for it.: Paid				No	Neutral	Yes
		Q16.2. I would be willing to allow medical research (pharmaceutical) using my medical record - if I got paid for it.: Unpaid2				Yes	Neutral	No
		Q17.1. I would be willing to allow medical research (public health) using my medical record - if I got paid for it.: Paid				No	Neutral	Yes
		Q17.2. I would be willing to allow medical research (public health) using my medical record - if I got paid for it.: Unpaid				Yes	Neutral	No
Good Governance combined Index		Voice and Accountability index	No				Neutral	Yes
		Political Stability and Absence of Violence/Terrorism index	No				Neutral	Yes
		Government Effectiveness index	No				Neutral	Yes
		Regulatory Quality index	No				Neutral	Yes
		Rule of Law index	No				Neutral	Yes
		Control of Corruption index	No				Neutral	Yes
Extended Good Governance combined Index		Freedom index	No				Neutral	Yes
		Democracy index	No				Neutral	Yes
		Corruption perception index	No				Neutral	Yes
		Happiness index	No				Neutral	Yes
		political rights index	No				Neutral	Yes
		civil liberties index	No				Neutral	Yes
		Morality index	No				Neutral	Yes
		Competitiveness index				0	Neutral	<10%	<20%	<30%	<40%	<50%	<60%	<70%	<80%	<90%	<100%	1
		Gini income inequality index				0	Neutral	<10%	<20%	<30%	<40%	<50%	<60%	<70%	<80%	<90%	<100%	1
		poverty, percent of population index				0	Neutral	<10%	<20%	<30%	<40%	<50%	<60%	<70%	<80%	<90%	<100%	1
Economic, Social and Demographic profile		Domestic general government health expenditure (% of current health expenditure) Share of current health expenditures funded from domestic public sources for health. Domestic public sources include domestic revenue as internal transfers and grants, transfers, subsidies to voluntary health insurance beneficiaries, non-profit institutions serving households (NPISH) or enterprise financing schemes a…				1	Neutral	<10%	<20%	<30%	<40%	<50%	<60%	<70%	<80%	<90%	<100%	1
		Domestic general government health expenditure per capita, PPP (current international B$) Public expenditure on health from domestic sources per capita expressed in international dollars at purchasing power parity.				2	Neutral	<10%	<20%	<30%	<40%	<50%	<60%	<70%	<80%	<90%	<100%	1
		Current health expenditure per capita, PPP (current international $)				3	Neutral	<10%	<20%	<30%	<40%	<50%	<60%	<70%	<80%	<90%	<100%	1
		Current health expenditure per capita (current US$) Current expenditures on health per capita in current US dollars. Estimates of current health expenditures include healthcare goods and services consumed during each year.				4	Neutral	<10%	<20%	<30%	<40%	<50%	<60%	<70%	<80%	<90%	<100%	1
		Current health expenditure (% of GDP) Level of current health expenditure expressed as a percentage of GDP. Estimates of current health expenditures include healthcare goods and services consumed during each year. This indicator does not include capital health expenditures such as buildings, machinery, IT and stocks of vaccines for emergency or outbreaks.				5	Neutral	<10%	<20%	<30%	<40%	<50%	<60%	<70%	<80%	<90%	<100%	1
		International migrant stock, total, International migrant stock is the number of people born in a country other than that in which they live. It also includes refugees. The data used to estimate the international migrant stock at a particular time are obtained mainly from population censuses. The estimates are derived from the data on foreign-born population--people who have residence in one coun…				6	Neutral	<10%	<20%	<30%	<40%	<50%	<60%	<70%	<80%	<90%	<100%	1
		International migrant stock (% of population) International migrant stock is the number of people born in a country other than that in which they live. It also includes refugees. The data used to estimate the international migrant stock at a particular time are obtained mainly from population censuses. The estimates are derived from the data on foreign-born population--people who have residence i…				7	Neutral	<10%	<20%	<30%	<40%	<50%	<60%	<70%	<80%	<90%	<100%	1
		Net migration, Net migration is the net total of migrants during the period, that is, the total number of immigrants less the annual number of emigrants, including both citizens and noncitizens. Data are five-year estimates.				8	Neutral	<10%	<20%	<30%	<40%	<50%	<60%	<70%	<80%	<90%	<100%	1
		Population, total, Total population is based on the de facto definition of population, which counts all residents regardless of legal status or citizenship. The values shown are midyear estimates.				9	Neutral	<10%	<20%	<30%	<40%	<50%	<60%	<70%	<80%	<90%	<100%	1
		GDP (current US$) GDP at purchaser's prices is the sum of gross value added by all resident producers in the economy plus any product taxes and minus any subsidies not included in the value of the products. It is calculated without making deductions for depreciation of fabricated assets or for depletion and degradation of natural resources. Data are in current U.S. dollars. Dollar figures for GDP…				10	Neutral	<10%	<20%	<30%	<40%	<50%	<60%	<70%	<80%	<90%	<100%	1
		GDP (current BillionUS$) Adjusted share GDP at purchaser's prices is the sum of gross value added by all resident producers in the economy plus any product taxes and minus any subsidies not included in the value of the products. It is calculated without making deductions for depreciation of fabricated assets or for depletion and degradation of natural resources. Data are in current U.S. dollars. …				11	Neutral	<10%	<20%	<30%	<40%	<50%	<60%	<70%	<80%	<90%	<100%	1
		Refugee population by country or territory of asylum, Refugees are people who are recognized as refugees under the 1951 Convention Relating to the Status of Refugees or its 1967 Protocol, the 1969 Organization of African Unity Convention Governing the Specific Aspects of Refugee Problems in Africa, people recognized as refugees in accordance with the UNHCR statute, people granted refugee-like hum…				12	Neutral	<10%	<20%	<30%	<40%	<50%	<60%	<70%	<80%	<90%	<100%	1
		Refugee population by country or territory of origin, Refugees are people who are recognized as refugees under the 1951 Convention Relating to the Status of Refugees or its 1967 Protocol, the 1969 Organization of African Unity Convention Governing the Specific Aspects of Refugee Problems in Africa, people recognized as refugees in accordance with the UNHCR statute, people granted refugee-like hum…				13	Neutral	<10%	<20%	<30%	<40%	<50%	<60%	<70%	<80%	<90%	<100%	1
		Refugees and Migrants Integration to HIS total (country of Asylum)				14	Neutral	<10%	<20%	<30%	<40%	<50%	<60%	<70%	<80%	<90%	<100%	1
		Refugees and Migrants Integration to HIS total (Home country)				15	Neutral	<10%	<20%	<30%	<40%	<50%	<60%	<70%	<80%	<90%	<100%	1
		Refugees and Migrants Domestic Healthcare Expendtures (%GDP-PPP)				16	Neutral	<10%	<20%	<30%	<40%	<50%	<60%	<70%	<80%	<90%	<100%	1
		Refugees and Migrants International (current) Healthcare Expendtures(%GDP-ppp)				17	Neutral	<10%	<20%	<30%	<40%	<50%	<60%	<70%	<80%	<90%	<100%	1
		Economic Burden of Healthcare Integration(Refugees and Migrants) (%GDP-Healthcare Bill)				18	Neutral	<10%	<20%	<30%	<40%	<50%	<60%	<70%	<80%	<90%	<100%	1
		Refugees and Migrants Access to subsidized Healthcare services)				19	Neutral	<10%	<20%	<30%	<40%	<50%	<60%	<70%	<80%	<90%	<100%	1
		Economic Burden of Transferred/Infictous Diseases(%GDP)				20	Neutral	<10%	<20%	<30%	<40%	<50%	<60%	<70%	<80%	<90%	<100%	1
		Optimized Domestic general government health expenditure (% of current health expenditure)				21	Neutral	<10%	<20%	<30%	<40%	<50%	<60%	<70%	<80%	<90%	<100%	1
		Optimized Domestic general government health expenditure per capita, PPP (current international B$)				22	Neutral	<10%	<20%	<30%	<40%	<50%	<60%	<70%	<80%	<90%	<100%	1
		Optimized Current health expenditure per capita, PPP (current international $)				23	Neutral	<10%	<20%	<30%	<40%	<50%	<60%	<70%	<80%	<90%	<100%	1
		Optimized Current health expenditure per capita (current US$)				24	Neutral	<10%	<20%	<30%	<40%	<50%	<60%	<70%	<80%	<90%	<100%	1
		Optimized Current health expenditure (% of GDP)				25	Neutral	<10%	<20%	<30%	<40%	<50%	<60%	<70%	<80%	<90%	<100%	1
		Optimized International migrant stock, total				26	Neutral	<10%	<20%	<30%	<40%	<50%	<60%	<70%	<80%	<90%	<100%	1
		Optimized International migrant stock (% of population)				27	Neutral	<10%	<20%	<30%	<40%	<50%	<60%	<70%	<80%	<90%	<100%	1
		Optimized Net migration				28	Neutral	<10%	<20%	<30%	<40%	<50%	<60%	<70%	<80%	<90%	<100%	1
		Optimized Population, total				29	Neutral	<10%	<20%	<30%	<40%	<50%	<60%	<70%	<80%	<90%	<100%	1
		Optimized GDP (current US$)				30	Neutral	<10%	<20%	<30%	<40%	<50%	<60%	<70%	<80%	<90%	<100%	1
		Optimized GDP (current BillionUS$)				31	Neutral	<10%	<20%	<30%	<40%	<50%	<60%	<70%	<80%	<90%	<100%	1
GPOC ECO Suppl Table 4: Illustratrates the scores model

## Sheet: GPOC Affiliation Indicators
GPOC Coeffiecient Model
Interactive set of Indicators to GPOC Affiliation, (Good Governance Combined Indicator)

[truncated: 1 more sheets: GPOC ECO Tab 5 Score_Models_Map]
